# Supplementary material
Source: PubMed Central journal article supplement (PMC5836370)
Supplement: supp_RA117.000107_4677_1_supp_3195_2sx2gr.pdf [file supp_RA117.000107_4677_1_supp_3195_2sx2gr.pdf]

1  
tr|A6XB80|A6XB80\_ACIBA MKVLRVLVTT TALLAAGAAM ADEAVVHDSY AFDKNQLIPV GARAEVGTG YGGALLWQAN  
acin\_baum\_BM4703 -----HDSY AFDKNQLIPV GARAEVGTG YGGALLWQAN  
acin\_baum\_BM4706 -----HDSY AFDKNQLIPV GARAEVGTG YGGALLWQAN  
acin\_baum\_CIP\_70\_34t -----HDSY AFDKNQLIPV GARAEVGTG YGGALLWQAN  
acin\_baum\_NIPH\_329 -----HDSY AFDKNQLIPV GARAEVGTG YGGALLWQAN  
acin\_baum\_NIPH\_335 -----HDSY AFDKNQLIPV GARAEVGTG YGGALLWQAN

61  
tr|A6XB80|A6XB80\_ACIBA PYVGLALGYN GGDISWTDDV SVNGTKYDLD MDNNNVYLNA EIRPWGASTN PWAQGLYIAA  
acin\_baum\_BM4703 PYVGLALGYN GGDISWTDDV SVNGTKYDLD MDNNNVYLNA EIRPWGASTN PWAQGLYIAA  
acin\_baum\_BM4706 PYVGLALGYN GGDISWTDDV SVNGTKYDLD MDNNNVYLNA EIRPWGASTN PWAQGLYIAA  
acin\_baum\_CIP\_70\_34t PYVGLALGYN GGDISWTDDV SVNGTKYDLD MDNNNVYLNA EIRPWGASTN PWAQGLYIAA  
acin\_baum\_NIPH\_329 PYVGLALGYN GGDISWTDDV SVNGTKYDLD MDNNNVYLNA EIRPWGASTN PWAQGLYIAA  
acin\_baum\_NIPH\_335 PYVGLALGYN GGDISWTDDV SVNGTKYDLD MDNNNVYLNA EIRPWGASTN PWAQGLYIAA

121  
tr|A6XB80|A6XB80\_ACIBA GAAYLDNDYD LAKRIGNGDT LSIDGKNYQQ AVPGQEGGVR GKMSYKNDIA PYLGFGFAPK  
acin\_baum\_BM4703 GAAYLDNDYD LAKRIGNGDT LSIDGKNYQQ AVPGQEGGVR GKMSYKNDIA PYLGFGFAPK  
acin\_baum\_BM4706 GAAYLDNDYD LAKRIGNGDT LSIDGKNYQQ AVPGQEGGVR GKMSYKNDIA PYLGFGFAPK  
acin\_baum\_CIP\_70\_34t GAAYLDNDYD LAKRIGNGDT LSIDGKNYQQ AVPGQEGGVR GKMSYKNDIA PYLGFGFAPK  
acin\_baum\_NIPH\_329 GAAYLDNDYD LAKRIGNGDT LSIDGKNYQQ AVPGQEGGVR GKMSYKNDIA PYLGFGFAPK  
acin\_baum\_NIPH\_335 GAAYLDNDYD LAKRIGNGDT LSIDGKNYQQ AVPGQEGGVR GKMSYKNDIA PYLGFGFAPK

181  
tr|A6XB80|A6XB80\_ACIBA ISKNWGVFGE VGAYYTGPNK VELTQYNLAP VTGNPTSAQD AVDKEANEIR NDNKYEWMPV  
acin\_baum\_BM4703 ISKNWGVFGE VGAYYTGPNK VELTQYNLAP VTGNPTSAQD AVDKEANEIR NDNKYEWMPV  
acin\_baum\_BM4706 ISKNWGVFGE VGAYYTGPNK VELTQYNLAP VTGNPTSAQD AVDKEANEIR NDNKYEWMPV  
acin\_baum\_CIP\_70\_34t ISKNWGVFGE VGAYYTGPNK VELTQYNLAP VTGNPTSAQD AVDKEANEIR NDNKYEWMPV  
acin\_baum\_NIPH\_329 ISKNWGVFGE VGAYYTGPNK VELTQYNLAP VTGNPTSAQD AVDKEANEIR NDNKYEWMPV  
acin\_baum\_NIPH\_335 ISKNWGVFGE VGAYYTGPNK VELTQYNLAP VTGNPTSAQD AVDKEANEIR NDNKYEWMPV

241  
tr|A6XB80|A6XB80\_ACIBA GKVGVMFYW  
acin\_baum\_BM4703 GKVGVMFYW  
acin\_baum\_BM4706 GKVGVMFYW  
acin\_baum\_CIP\_70\_34t GKVGVMFYW  
acin\_baum\_NIPH\_329 GKVGVMFYW  
acin\_baum\_NIPH\_335 GKVGVMFYW
