# Supplementary material
Source: PubMed Central journal article supplement (PMC5836370)
Supplement: supp_RA117.000107_4677_1_supp_3197_zwp1vq.pdf [file supp_RA117.000107_4677_1_supp_3197_zwp1vq.pdf]

## Contents of Supplemental Figures & Table

|                                                                                             |    |
|---------------------------------------------------------------------------------------------|----|
| Contents of Supplemental Figures & Table.....                                               | 1  |
| Supplemental Figures.....                                                                   | 2  |
| Supplemental Fig. S1: Histogram of Pearson’s product-moment coefficients .....              | 2  |
| Supplemental Fig. S2a: correlation curves for AdeJ measurement via SRM in ANC4097 sample .. | 3  |
| Supplemental Fig. S2b: correlation curves for GES measurement via SRM in BM4701 sample..... | 4  |
| Supplemental Fig. S3a : histogram of CV distributions .....                                 | 5  |
| Supplemental Fig. S3b : CV <i>versus</i> average of relative protein quantitation.....      | 6  |
| Supplemental Fig. S4 : characteristic peptide peaks by SRM.....                             | 7  |
| Supplemental Fig. S5 : OXA-58 gene identified in NIPH 1362 by new WGS. ....                 | 8  |
| Supplemental Fig. S6a : ADC protein <i>versus</i> mRNA production.....                      | 8  |
| Supplemental Fig. S6b : AdeJ protein <i>versus</i> mRNA production.....                     | 9  |
| Supplemental Tables .....                                                                   | 10 |
| Supplemental Table S1 : strains sequenced in this study. ....                               | 10 |
| Supplemental Table S2 to S4 : see specific files. ....                                      | 11 |
| Supplemental Table S5 : specificity of peptides used for OXA quantitation.....              | 11 |

## Supplemental Figures

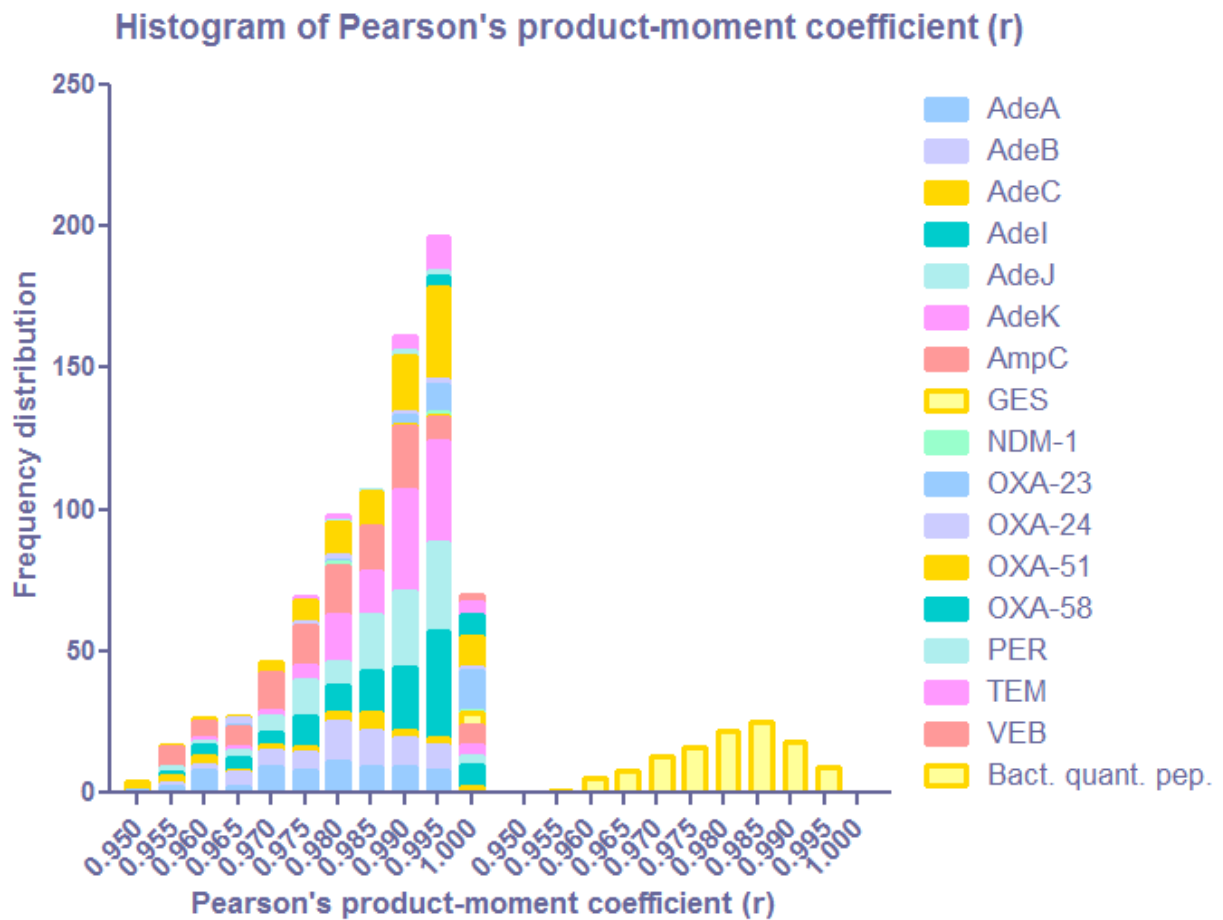

**Supplemental Fig. S1: Histogram of Pearson's product-moment coefficients (r)** calculated between the non-zero transition areas of each strain and reference transition areas estimated by averaging all the non-zero transition areas from the whole data set. The distribution of bacterial quantotypic peptides are on the right and the cumulative distribution of other proteins on the left.

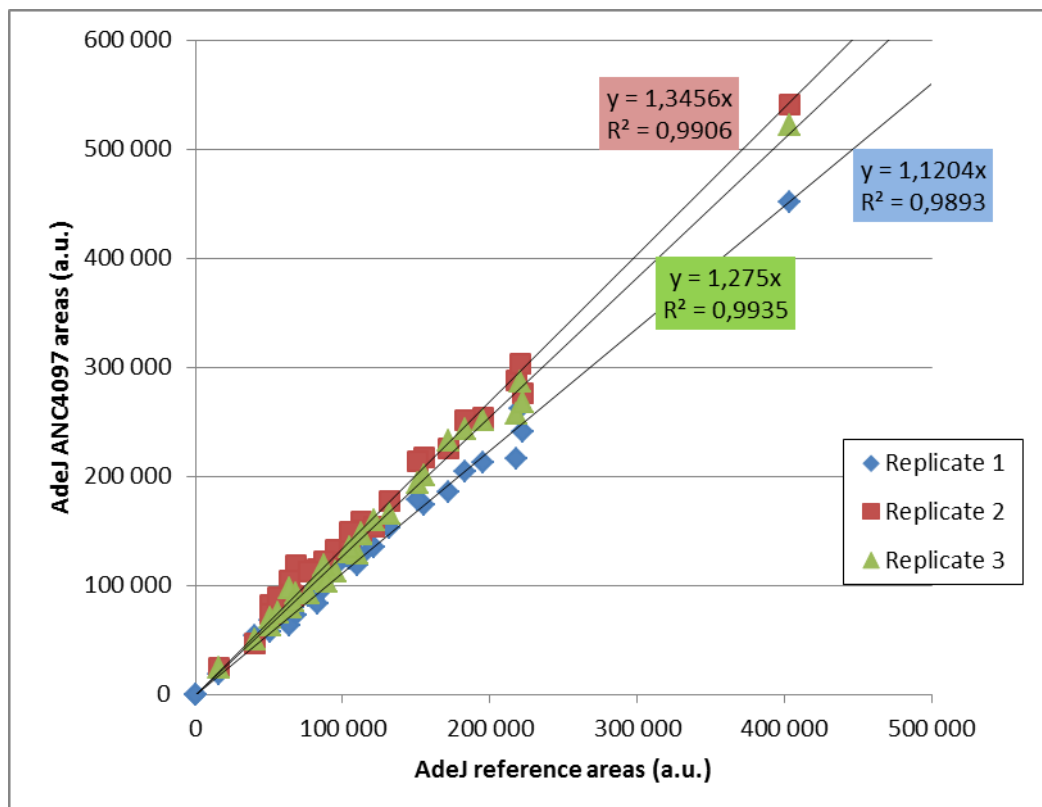

**Supplemental Fig. S2a: correlation curves for AdeJ measurement via SRM in ANC4097 sample, relative protein quantitation 2.4/4.9%.**

|     | Protein class | Protein Name | Peptide           | Transitions                 | Retention Time(min) | Quantotypic and Proteotypic | Used for quantitation |
|-----|---------------|--------------|-------------------|-----------------------------|---------------------|-----------------------------|-----------------------|
| 247 | Efflux pump   | AdeJ         | GEDLLDATLHAAK     | AdeJ.GEDLLDATLHAAK.+2y8     | 15,44               | Used                        |                       |
| 248 | Efflux pump   | AdeJ         | GEDLLDATLHAAK     | AdeJ.GEDLLDATLHAAK.+3y7     | 15,44               | Used                        |                       |
| 249 | Efflux pump   | AdeJ         | GEDLLDATLHAAK     | AdeJ.GEDLLDATLHAAK.+3y8     | 15,44               | Used                        |                       |
| 250 | Efflux pump   | AdeJ         | GMALNMIK          | AdeJ.GMALNMIK.+2y5          | 16,8                | Used                        |                       |
| 251 | Efflux pump   | AdeJ         | GMALNMIK          | AdeJ.GMALNMIK.+2y6          | 16,8                | Used                        |                       |
| 252 | Efflux pump   | AdeJ         | GMALNMIK          | AdeJ.GMALNMIK.+2y7          | 16,8                | Used                        |                       |
| 253 | Efflux pump   | AdeJ         | IATGANALDTAEAVEQR | AdeJ.IATGANALDTAEAVEQR.+3y4 | 13                  | Used                        |                       |
| 254 | Efflux pump   | AdeJ         | IATGANALDTAEAVEQR | AdeJ.IATGANALDTAEAVEQR.+3y5 | 13                  | Used                        |                       |
| 255 | Efflux pump   | AdeJ         | IATGANALDTAEAVEQR | AdeJ.IATGANALDTAEAVEQR.+3y6 | 13                  | Used                        |                       |
| 256 | Efflux pump   | AdeJ         | IAWGGSYINDFVDR    | AdeJ.IAWGGSYINDFVDR.+2y6    | 18,5                | Used                        |                       |
| 257 | Efflux pump   | AdeJ         | IAWGGSYINDFVDR    | AdeJ.IAWGGSYINDFVDR.+2y7    | 18,5                | Used                        |                       |
| 258 | Efflux pump   | AdeJ         | IAWGGSYINDFVDR    | AdeJ.IAWGGSYINDFVDR.+3y6    | 18,5                | Used                        |                       |
| 259 | Efflux pump   | AdeJ         | IWLDPK            | AdeJ.IWLDPK.+2y3            | 13,56               | Used                        | TopTra2TopPep3        |
| 260 | Efflux pump   | AdeJ         | IWLDPK            | AdeJ.IWLDPK.+2y5            | 13,56               | Used                        | TopTra2TopPep3        |
| 261 | Efflux pump   | AdeJ         | IWLDPK            | AdeJ.IWLDPK.+2y6            | 13,56               | Used                        |                       |
| 265 | Efflux pump   | AdeJ         | NYPTGLADK         | AdeJ.NYPTGLADK.+2y5         | 9                   | Used                        |                       |
| 266 | Efflux pump   | AdeJ         | NYPTGLADK         | AdeJ.NYPTGLADK.+2y6         | 9                   | Used                        | TopTra2TopPep3        |
| 267 | Efflux pump   | AdeJ         | NYPTGLADK         | AdeJ.NYPTGLADK.+2y7         | 9                   | Used                        | TopTra2TopPep3        |
| 268 | Efflux pump   | AdeJ         | SFNNGFDR          | AdeJ.SFNNGFDR.+2y4          | 9,4                 | Used                        |                       |
| 269 | Efflux pump   | AdeJ         | SFNNGFDR          | AdeJ.SFNNGFDR.+2y5          | 9,4                 | Used                        |                       |
| 270 | Efflux pump   | AdeJ         | SFNNGFDR          | AdeJ.SFNNGFDR.+2y6          | 9,4                 | Used                        |                       |
| 271 | Efflux pump   | AdeJ         | TPPETQIGSLIQR     | AdeJ.TPPETQIGSLIQR.+2y6     | 14,9                | Used                        |                       |
| 272 | Efflux pump   | AdeJ         | TPPETQIGSLIQR     | AdeJ.TPPETQIGSLIQR.+2y7     | 14,9                | Used                        |                       |
| 273 | Efflux pump   | AdeJ         | TPPETQIGSLIQR     | AdeJ.TPPETQIGSLIQR.+3y6     | 14,9                | Used                        |                       |
| 274 | Efflux pump   | AdeJ         | VELGSDNYQFDSK     | AdeJ.VELGSDNYQFDSK.+2y3     | 12,14               | Used                        |                       |
| 275 | Efflux pump   | AdeJ         | VELGSDNYQFDSK     | AdeJ.VELGSDNYQFDSK.+2y4     | 12,14               | Used                        |                       |
| 276 | Efflux pump   | AdeJ         | VELGSDNYQFDSK     | AdeJ.VELGSDNYQFDSK.+2y7     | 12,14               | Used                        |                       |
| 277 | Efflux pump   | AdeJ         | VMSEDHTDPVTATSR   | AdeJ.VMSEDHTDPVTATSR.+3y4   | 8                   | Used                        |                       |
| 278 | Efflux pump   | AdeJ         | VMSEDHTDPVTATSR   | AdeJ.VMSEDHTDPVTATSR.+3y5   | 8                   | Used                        |                       |
| 279 | Efflux pump   | AdeJ         | VMSEDHTDPVTATSR   | AdeJ.VMSEDHTDPVTATSR.+3y7   | 8                   | Used                        |                       |
| 280 | Efflux pump   | AdeJ         | VYVQGDAGSR        | AdeJ.VYVQGDAGSR.+2y6        | 5,6                 | Used                        | TopTra2TopPep3        |
| 281 | Efflux pump   | AdeJ         | VYVQGDAGSR        | AdeJ.VYVQGDAGSR.+2y7        | 5,6                 | Used                        | TopTra2TopPep3        |
| 282 | Efflux pump   | AdeJ         | VYVQGDAGSR        | AdeJ.VYVQGDAGSR.+2y8        | 5,6                 | Used                        |                       |

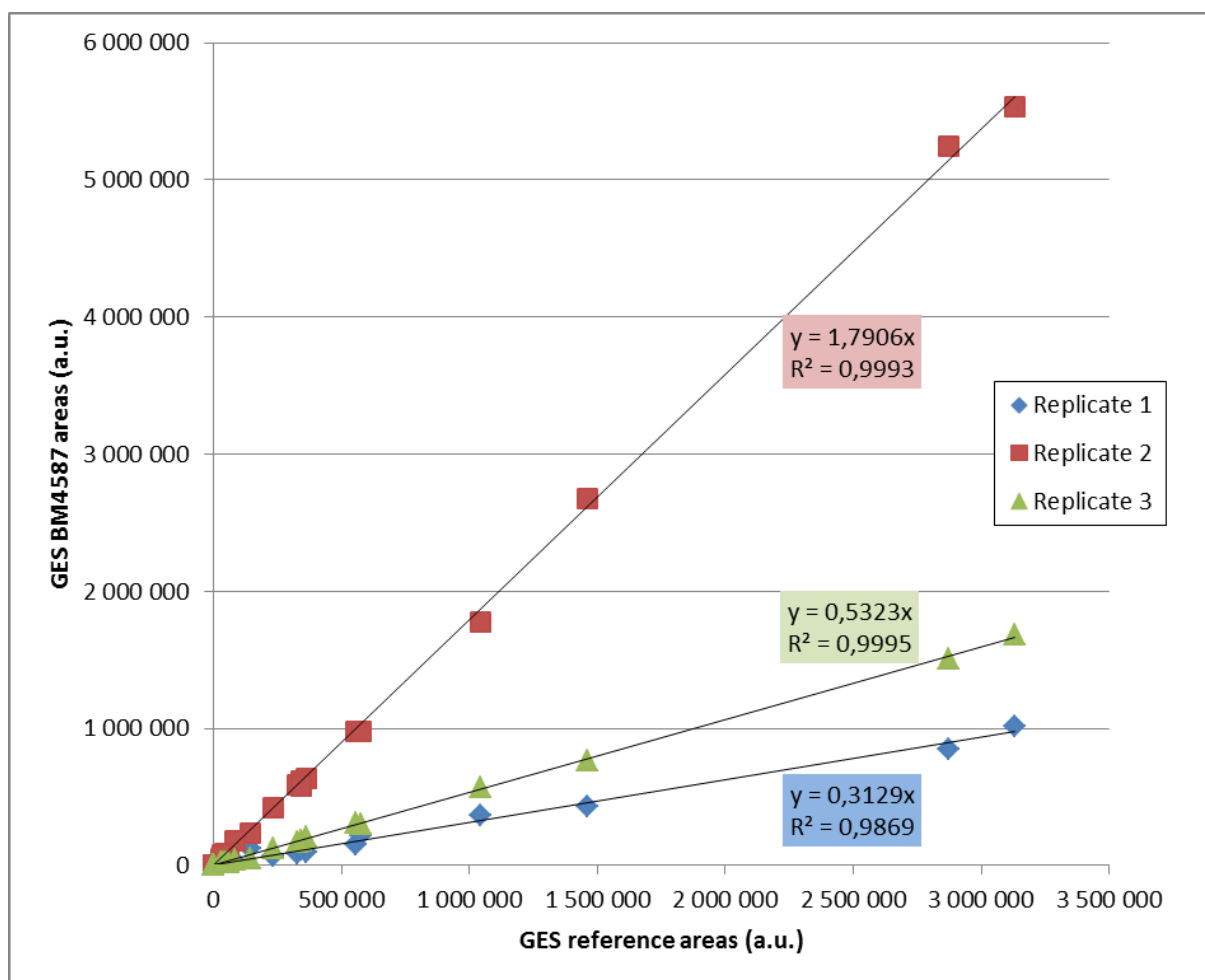

**Supplemental Fig. S2b: correlation curves for GES measurement via SRM in BM4701 sample, relative protein quantitation 8.1/89.8%.**

|     | Protein class                    | Protein Name | Peptide              | Transitions                      | Retention Time(min) | Quantotypic and Proteotypic | Used for quantitation |
|-----|----------------------------------|--------------|----------------------|----------------------------------|---------------------|-----------------------------|-----------------------|
| 343 | Wide-Spectrum $\beta$ -lactamase | GES          | AAEIGVAIVDPQGEIVAGHR | GES.AAEIGVAIVDPQGEIVAGHR.+3y13+2 | 15,5                | Used                        |                       |
| 344 | Wide-Spectrum $\beta$ -lactamase | GES          | AAEIGVAIVDPQGEIVAGHR | GES.AAEIGVAIVDPQGEIVAGHR.+3y14+2 | 15,5                | Used                        |                       |
| 345 | Wide-Spectrum $\beta$ -lactamase | GES          | AAEIGVAIVDPQGEIVAGHR | GES.AAEIGVAIVDPQGEIVAGHR.+3y16+2 | 15,5                | Used                        |                       |
| 346 | Wide-Spectrum $\beta$ -lactamase | GES          | AAQIGVAIVDPQGEIVAGHR | GES.AAQIGVAIVDPQGEIVAGHR.+3y13+2 | 15,5                | Used                        |                       |
| 347 | Wide-Spectrum $\beta$ -lactamase | GES          | AAQIGVAIVDPQGEIVAGHR | GES.AAQIGVAIVDPQGEIVAGHR.+3y14+2 | 15,5                | Used                        | TopTra2TopPep3        |
| 348 | Wide-Spectrum $\beta$ -lactamase | GES          | AAQIGVAIVDPQGEIVAGHR | GES.AAQIGVAIVDPQGEIVAGHR.+3y16+2 | 15,5                | Used                        | TopTra2TopPep3        |
| 352 | Wide-Spectrum $\beta$ -lactamase | GES          | DWVVGEK              | GES.DWVVGEK.+2y4                 | 11,2                | Used                        | TopTra2TopPep3        |
| 353 | Wide-Spectrum $\beta$ -lactamase | GES          | DWVVGEK              | GES.DWVVGEK.+2y5                 | 11,2                | Used                        | TopTra2TopPep3        |
| 354 | Wide-Spectrum $\beta$ -lactamase | GES          | DWVVGEK              | GES.DWVVGEK.+2y6                 | 11,2                | Used                        |                       |
| 355 | Wide-Spectrum $\beta$ -lactamase | GES          | DYAVAVYTTAPK         | GES.DYAVAVYTTAPK.+2y6            | 12,5                | Used                        |                       |
| 356 | Wide-Spectrum $\beta$ -lactamase | GES          | DYAVAVYTTAPK         | GES.DYAVAVYTTAPK.+2y7            | 12,5                | Used                        |                       |
| 357 | Wide-Spectrum $\beta$ -lactamase | GES          | DYAVAVYTTAPK         | GES.DYAVAVYTTAPK.+2y8            | 12,5                | Used                        |                       |
| 370 | Wide-Spectrum $\beta$ -lactamase | GES          | LSYGPDMIVWSPATER     | GES.LSYGPDMIVWSPATER.+3y5        | 19,1                | Used                        |                       |
| 371 | Wide-Spectrum $\beta$ -lactamase | GES          | LSYGPDMIVWSPATER     | GES.LSYGPDMIVWSPATER.+3y6        | 19,1                | Used                        |                       |
| 372 | Wide-Spectrum $\beta$ -lactamase | GES          | LSYGPDMIVWSPATER     | GES.LSYGPDMIVWSPATER.+3y7        | 19,1                | Used                        |                       |
| 373 | Wide-Spectrum $\beta$ -lactamase | GES          | NDIGFFK              | GES.NDIGFFK.+2y4                 | 14,4                | Used                        | TopTra2TopPep3        |
| 374 | Wide-Spectrum $\beta$ -lactamase | GES          | NDIGFFK              | GES.NDIGFFK.+2y5                 | 14,4                | Used                        | TopTra2TopPep3        |
| 375 | Wide-Spectrum $\beta$ -lactamase | GES          | NDIGFFK              | GES.NDIGFFK.+2y6                 | 14,4                | Used                        |                       |

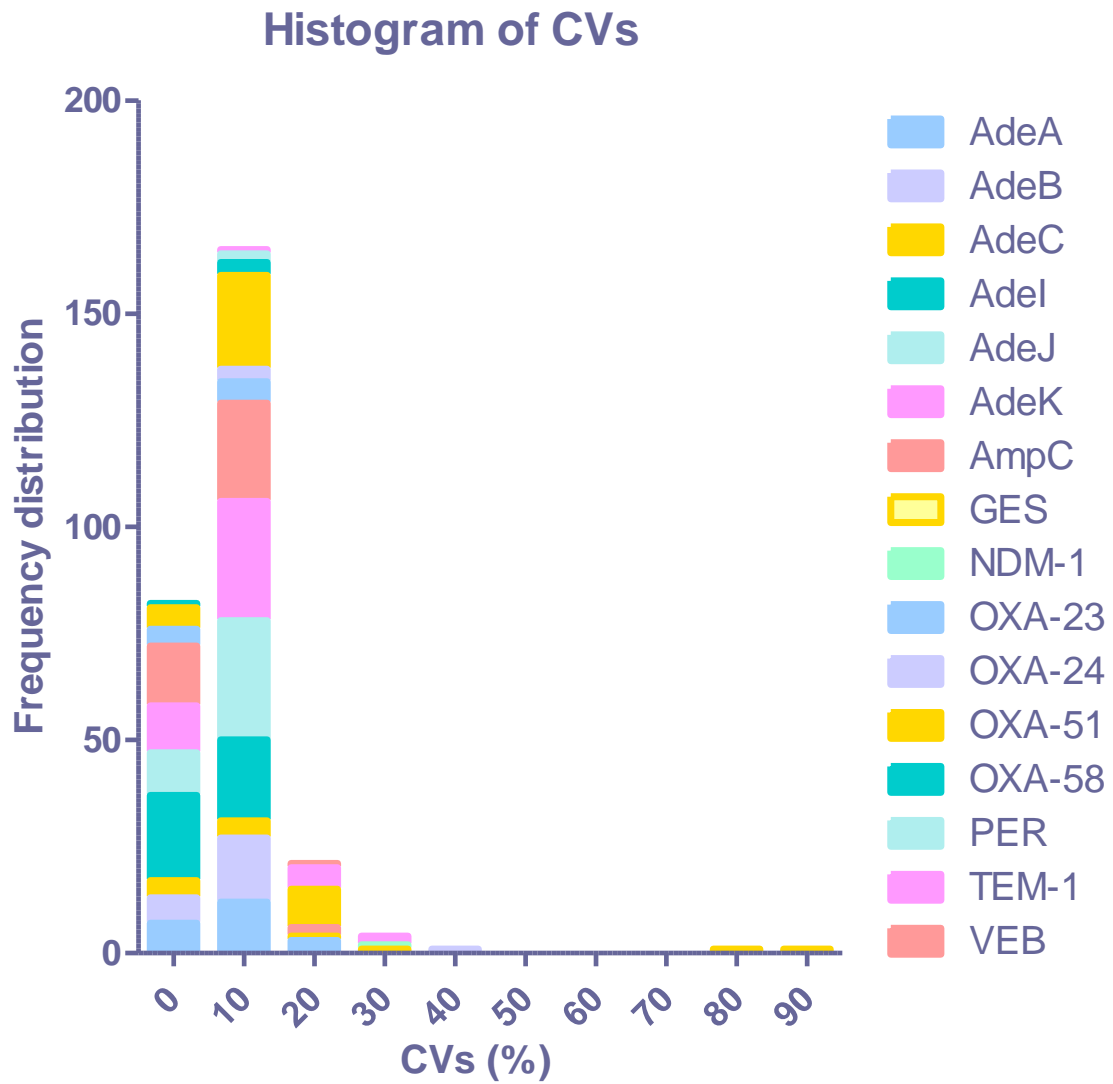

**Supplemental Fig. S3a : histogram of CV distributions.** CVs were calculated using SRM measurements from three biological replicates.

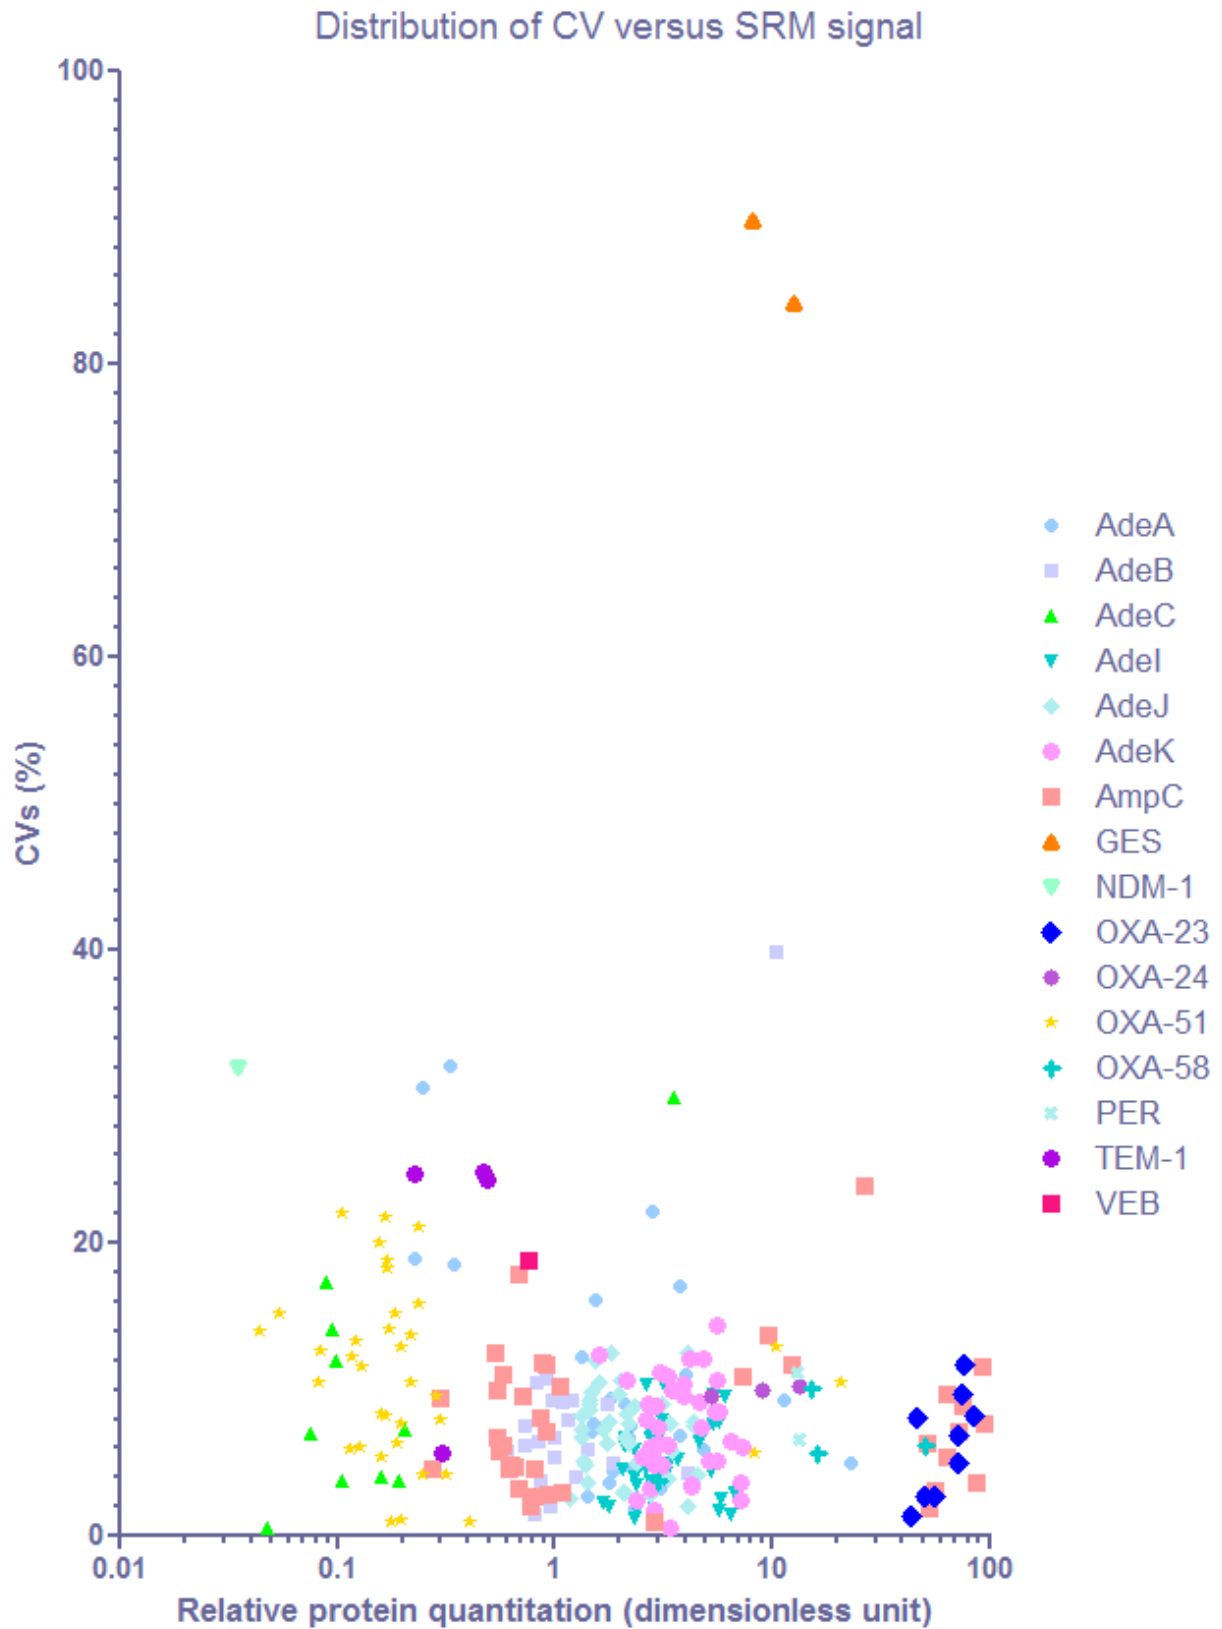

**Supplemental Fig. S3b : CV versus average of relative protein quantitation.**  
 CVs and averages were calculated using SRM measurements from three biological replicates.

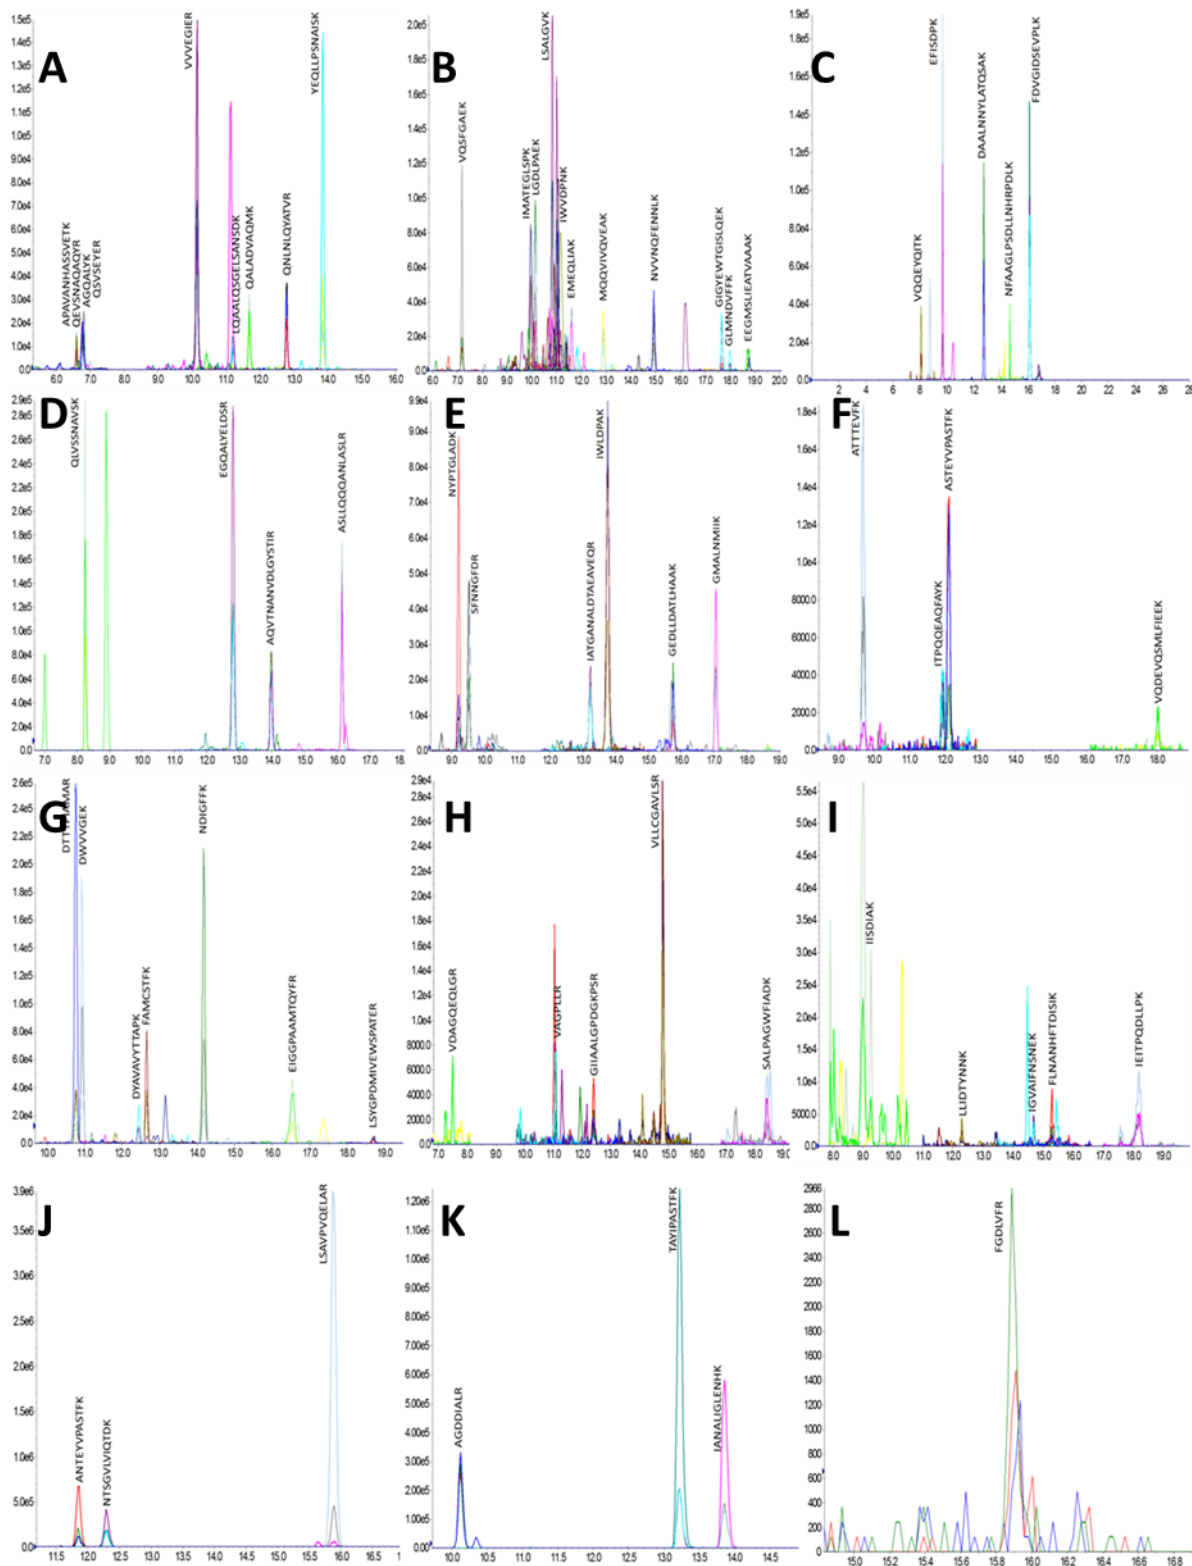

**Supplemental Fig. S4 : characteristic peptide peaks by SRM** (in replicate 1), from top to bottom, left to right. **A:** AdeA in BM4704 (4.8/5.9%); **B:** AdeB in CIP 70.34<sup>T</sup> (4.1/4.3%); **C:** AdeC in NIPH 290 (3.5/3.0); **D:** AdeI in NIPH 335 (5.7 /1.8%); **E:** AdeJ in NIPH 527 (1.8/12.5%); **F:** OXA-51 like in NIPH 190 (0.3/7.9%); **G:** GES in BM4701 (8.1/89.8%); **H:** TEM-1 in ANC 4097 (0.49/24.3%); **I:** VEB in AYE (0.76/18.8%); **J:** OXA-23 in ANC 4097 (46.1/2.7%); **K:** OXA-58 in NIPH 1362: 15.1/10%; **L:** NDM-1 in ANC 4097 (0.04/31.9%). Peaks were detected using MultiQuant<sup>TM</sup> 2.1 and areas under 3,000 Sciex arbitrary unit (a.u.) were set to null.

```
>acin_baum_NIPH_1362_redo
```

```
MKLLKILSLVCLISIGACAEHSMSRAKTSTIPQVNNIIDQNVQALFNEISADAVFVTYDGQNIKKYGTHLDRAKTAYI  
PASTFKIANALIGLENHKATSTEIFKWDGKPRFFKAWDKDFTLGEAMQASTVPVYQELARRIGPSLMQSELQRIGYG  
NMQIGTEVDQFWLKGPLTITPIQEVKFVYDLAQGQLPFKPEVQQQVKEMLYVERRGENRLYAKSGWGMVAVDPO  
VGWYVGFVEKADGQVVAFALNMQMKAAGDDIALRKQLSLDVLDKLGVFHYL
```

**Supplemental Fig. S5** : OXA-58 gene identified in NIPH 1362 by new WGS.

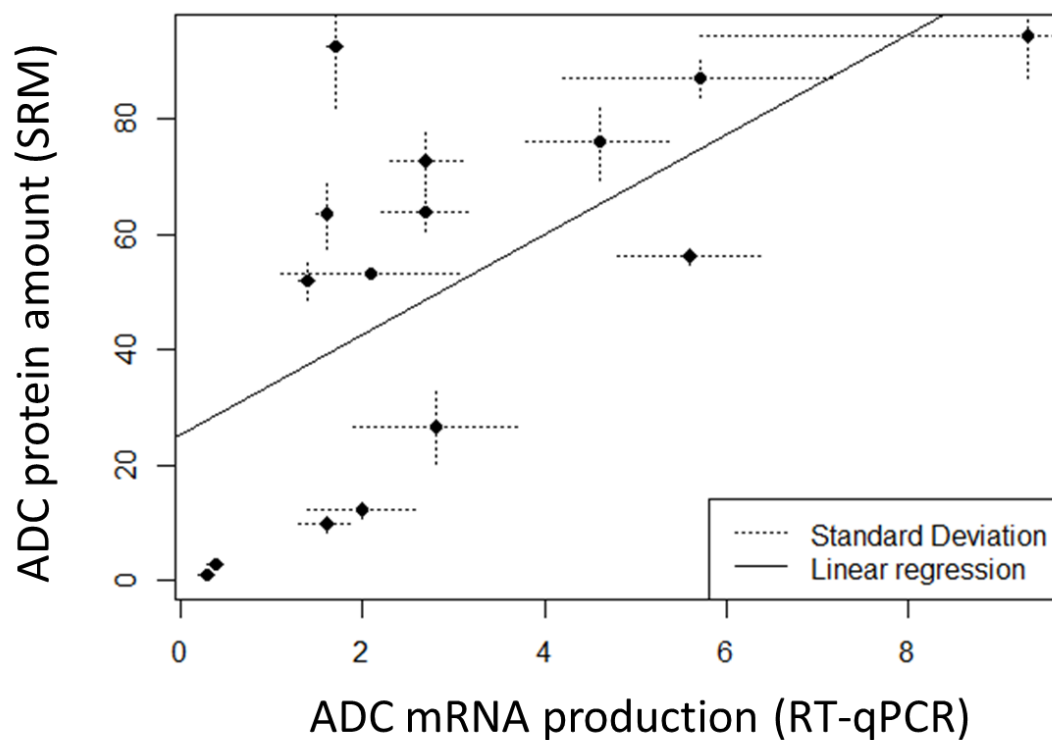

**Supplemental Fig. S6a : ADC protein versus mRNA production.** Correlation between mRNA synthesis (RT-qPCR) expression and protein quantitation (SRM). For SRM, 3 samples were analyzed from 3 different biological cultures. For RT-qPCR, at least 2 samples were analyzed from the same biological culture. Pearson's product-moment correlation p-values was 0.01057.



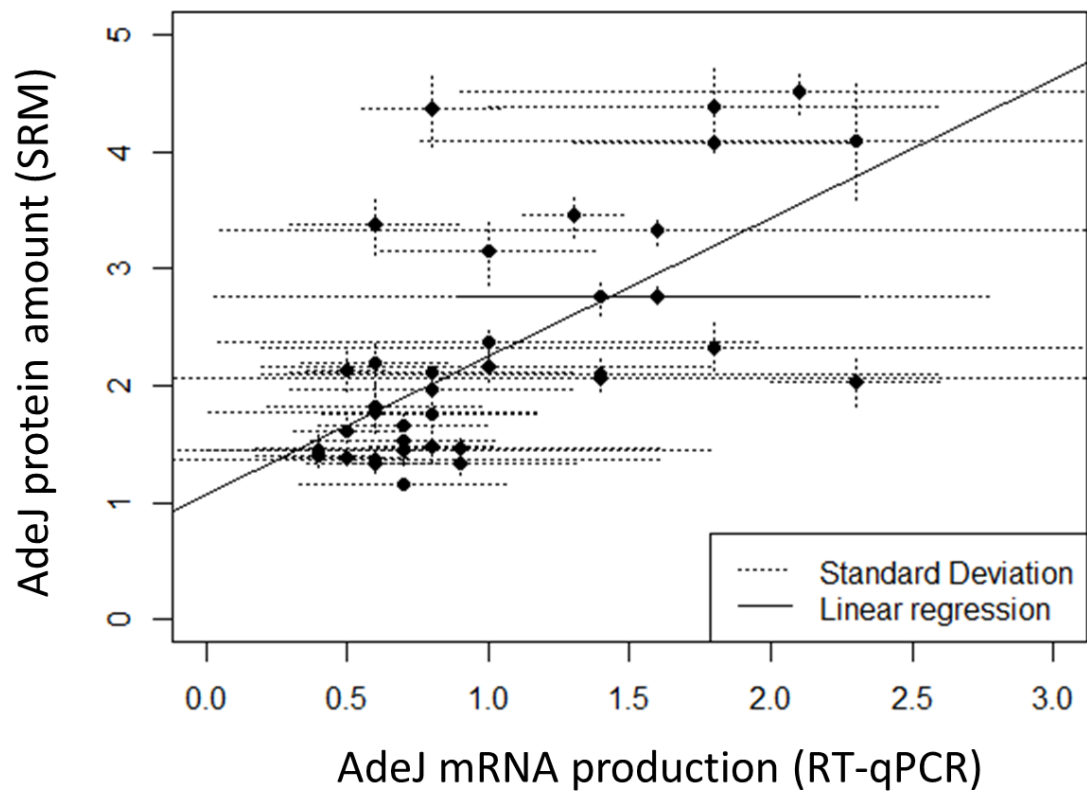

**Supplemental Fig. S6b : AdeJ protein *versus* mRNA production.** Correlation between AdeJ mRNA synthesis (RT-qPCR) expression and protein quantitation (SRM). For SRM, 3 samples were analyzed from 3 different biological cultures. For RT-qPCR, at least 2 samples were analyzed from the same biological culture. Pearson's product-moment correlation p-values was  $1.379 \times 10^{-5}$ .

## Supplemental Tables

| Sample Name     | Reference (PMID numbers)   | DNA Purity from NanoDrop A(260)/A(280) | DNA quantity from QuBit (ng/uL) |
|-----------------|----------------------------|----------------------------------------|---------------------------------|
| <b>NIPH1362</b> | Nemec 2004, Diancourt 2010 | 1.83                                   | 83.6                            |
| <b>BM4701</b>   | Jeannot 2014               | 1.89                                   | 16.8                            |
| <b>BM4702</b>   | Jeannot 2014               | 1.85                                   | 46.3                            |
| <b>BM4703</b>   | Jeannot 2014               | 1.93                                   | 58.1                            |
| <b>BM4704</b>   | Jeannot 2014               | 1.94                                   | 48.5                            |
| <b>BM4705</b>   | Jeannot 2014               | 1.93                                   | 70.1                            |
| <b>BM4706</b>   | Jeannot 2014               | 1.84                                   | 37.3                            |
| <b>BM4707</b>   | Jeannot 2014               | 1.86                                   | 77.2                            |
| <b>BM4708</b>   | Jeannot 2014               | 1.86                                   | 53.6                            |
| <b>BM4709</b>   | Jeannot 2014               | 1.88                                   | 34.6                            |
| <b>BM4710</b>   | Jeannot 2014               | 1.85                                   | 85.4                            |
| <b>BM4711</b>   | Jeannot 2014               | 1.87                                   | 24.7                            |
| <b>BM4712</b>   | Jeannot 2014               | 1.89                                   | 105.0                           |
| <b>BM4713</b>   | Jeannot 2014               | 1.83                                   | 58.3                            |

**Supplemental Table S1 : strains sequenced in this study.**

## Supplemental Table S2 to S4 : see specific files.

### OXA-23

>tr|A0A0E1PW85|A0A0E1PW85\_ACIBA OXA-23 protein OS=Acinetobacter baumannii NCGM 237  
GN=blaOXA-23 PE=4 SV=1  
MNKYFTCYVVASLFLSGCTVQHNLINETPSQIVQGHNQVIHQYFDEKNTSGVLVIQTDKKINLYGNALS  
RANTEYVPASTFKMLNALIGLENQKTDINEIFKWKGEKRSFTAWEKDMTLGEAMKLSAVPVYQELARR  
IGLDLMQKEVKRIGFGNAEIGQQVDNFWLVGPLKVTPIQEVFVSQLAHTQLPFSEKVVQANVKNMLLL  
EESNGYKIFGKTGWAMDIKPQVGWLTGWVEQPDGK  
IVAFALNMEMRSEMPASIRNELLMKSLKQLNII

### OXA-24

>tr|Q8RLA6|Q8RLA6\_ACIBA Beta-lactamase OS=Acinetobacter baumannii GN=blaOXA-33 PE=1 SV=1  
MKKFILPIFSISILVSLACSSIKTKSEDNFHISSQQHEKAIKSYFDEAQTQGVIIEGKLNSTYGNALARA  
NKEYVPASTFKMLNALIGLENHKATTNEIFKWDGKKRTYPMWEKDMTLGEAMALSAPVYQELARR  
TGLELMQKEVKRVNFGNTNIGTQVDNFWLVGPLKITPVQEVNFADDLAHNRLPFKLETQEEVKKMLLI  
KEVNGSKIYAKSGWGMGVTPQVGWLTGWVEQANGKKIPFSLNLEMKEGMSGIRNEITYKSLENLGII

### OXA-51

>tr|Q5QT35|Q5QT35\_ACIBA Beta-lactamase OS=Acinetobacter baumannii GN=oxa-51 PE=1 SV=1  
MNIKTLLLITSAIFISACSPYIVTANPNHSASKSDEKAEEKIKNLFNEVHTTGVLVIQQGQTQOSYGNDLAR  
ASTEYVPASTFKMLNALIGLEHHKATTTEVFKWDGQKRLFPWEKDMTLGDAMKASAIPVYQDLARRI  
GLELMSKEVKRVGYGNADIGTQVDNFWLVGPLKITPQQAQFAFKLANKTLPFSPKVQDEVQSMLFIE  
EKNGNKIYAKSGWGDVDPQVGWLTGWVVPQGNIVAFSLNLEMKKGIPSSVRKEITYKSLEQLGIL

### OXA-58

>tr|Q2TR58|Q2TR58\_ACIBA Beta-lactamase OS=Acinetobacter baumannii GN=blaOXA-58 PE=1 SV=1  
MKLLKILSLVCLISIGACAEHSMSRAKTSTIPQVNNIIDQNVQALFNEISADAVFVTYDGGQNIKKYGTH  
LDRAKTAYIPASTFKIANALIGLENHKATSTEIFKWDGKPRFFKAWDKDFTLGEAMQASTVPVYQELAR  
RIGPSLMQSELQRIGYGNMQIGTEVDQFWLKGPLTITPIQEVKVVYDLAQQQLPFKPEVQQQVKEMLYV  
ERRGENRLYAKSGWGMAVDPQVGWYVGFVEKADGQVVAFALNMQMKGDDIALRKQLSLDVLDKL  
GVFHYL

## Supplemental Table S5 : specificity of peptides used for OXA quantitation.

Peptides in green and yellow are unique and therefore specific. Sequence LSAVPVYQELAR (in blue) is shared by OXA-23 and OXA-24 but cannot be detected in OXA-24 digested using trypsin, because of upstream sequence alteration (DMTLGEAMK *versus* DMTLGEAMAL).
