# Supplementary material
Source: PubMed Central journal article supplement (PMC5836370)
Supplement: supp_RA117.000107_4677_1_supp_3198_ssxsgs.pdf [file supp_RA117.000107_4677_1_supp_3198_ssxsgs.pdf]

1

|                          |            |            |            |            |            |            |
|--------------------------|------------|------------|------------|------------|------------|------------|
| AdeJ_Pasteur             | MAQFFIHRPI | FAWVIALVIM | LAGILTLTKM | PIAQYPTIAP | PTVTIAATYP | GASAETVENT |
| acin_baum_ANC_4097       | MAQFFIHRPI | FAWVIALVIM | LAGILTLTKM | PIAQYPTIAP | PTVTIAATYP | GASAETVENT |
| acin_baum_AYE            | MAQFFIHRPI | FAWVIALVIM | LAGILTLTKM | PIAQYPTIAP | PTVTIAATYP | GASAETVENT |
| acin_baum_BM4587         | MAQFFIHRPI | FAWVIALVIM | LAGILTLTKM | PIAQYPTIAP | PTVTIAATYP | GASAETVENT |
| acin_baum_BM4701         | MAQFFIHRPI | FAWVIALVIM | LAGILTLTKM | PIAQYPTIAP | PTVTIAATYP | GASAETVENT |
| acin_baum_BM4702         | MAQFFIHRPI | FAWVIALVIM | LAGILTLTKM | PIAQYPTIAP | PTVTIAATYP | GASAETVENT |
| acin_baum_BM4703         | MAQFFIHRPI | FAWVIALVIM | LAGILTLTKM | PIAQYPTIAP | PTVTIAATYP | GASAETVENT |
| acin_baum_BM4704         | MAQFFIHRPI | FAWVIALVIM | LAGILTLTKM | PIAQYPTIAP | PTVTIAATYP | GASAETVENT |
| acin_baum_BM4705         | MAQFFIHRPI | FAWVIALVIM | LAGILTLTKM | PIAQYPTIAP | PTVTIAATYP | GASAETVENT |
| acin_baum_BM4706         | MAQFFIHRPI | FAWVIALVIM | LAGILTLTKM | PIAQYPTIAP | PTVTIAATYP | GASAETVENT |
| acin_baum_BM4707         | MAQFFIHRPI | FAWVIALVIM | LAGILTLTKM | PIAQYPTIAP | PTVTIAATYP | GASAETVENT |
| acin_baum_BM4708         | MAQFFIHRPI | FAWVIALVIM | LAGILTLTKM | PIAQYPTIAP | PTVTIAATYP | GASAETVENT |
| acin_baum_BM4709         | MAQFFIHRPI | FAWVIALVIM | LAGILTLTKM | PIAQYPTIAP | PTVTIAATYP | GASAETVENT |
| acin_baum_BM4710         | MAQFFIHRPI | FAWVIALVIM | LAGILTLTKM | PIAQYPTIAP | PTVTIAATYP | GASAETVENT |
| acin_baum_BM4711         | MAQFFIHRPI | FAWVIALVIM | LAGILTLTKM | PIAQYPTIAP | PTVTIAATYP | GASAETVENT |
| acin_baum_BM4712         | MAQFFIHRPI | FAWVIALVIM | LAGILTLTKM | PIAQYPTIAP | PTVTIAATYP | GASAETVENT |
| acin_baum_BM4713         | MAQFFIHRPI | FAWVIALVIM | LAGILTLTKM | PIAQYPTIAP | PTVTIAATYP | GASAETVENT |
| acin_baum_BM4714         | MAQFFIHRPI | FAWVIALVIM | LAGILTLTKM | PIAQYPTIAP | PTVTIAATYP | GASAETVENT |
| acin_baum_CIP_70_34t     | MAQFFIHRPI | FAWVIALVIM | LAGILTLTKM | PIAQYPTIAP | PTVTIAATYP | GASAETVENT |
| acin_baum_MRSN_3405      | MAQFFIHRPI | FAWVIALVIM | LAGILTLTKM | PIAQYPTIAP | PTVTIAATYP | GASAETVENT |
| acin_baum_NIPH_1362      | MAQFFIHRPI | FAWVIALVIM | LAGILTLTKM | PIAQYPTIAP | PTVTIAATYP | GASAETVENT |
| acin_baum_NIPH_1362_redo | MAQFFIHRPI | FAWVIALVIM | LAGILTLTKM | PIAQYPTIAP | PTVTIAATYP | GASAETVENT |
| acin_baum_NIPH_146       | MAQFFIHRPI | FAWVIALVIM | LAGILTLTKM | PIAQYPTIAP | PTVTIAATYP | GASAETVENT |
| acin_baum_NIPH_1669      | MAQFFIHRPI | FAWVIALVIM | LAGILTLTKM | PIAQYPTIAP | PTVTIAATYP | GASAETVENT |
| acin_baum_NIPH_1734      | MAQFFIHRPI | FAWVIALVIM | LAGILTLTKM | PIAQYPTIAP | PTVTIAATYP | GASAETVENT |
| acin_baum_NIPH_190       | MAQFFIHRPI | FAWVIALVIM | LAGILTLTKM | PIAQYPTIAP | PTVTIAATYP | GASAETVENT |
| acin_baum_NIPH_201       | MAQFFIHRPI | FAWVIALVIM | LAGILTLTKM | PIAQYPTIAP | PTVTIAATYP | GASAETVENT |
| acin_baum_NIPH_2061      | MAQFFIHRPI | FAWVIALVIM | LAGILTLTKM | PIAQYPTIAP | PTVTIAATYP | GASAETVENT |
| acin_baum_NIPH_24        | MAQFFIHRPI | FAWVIALVIM | LAGILTLTKM | PIAQYPTIAP | PTVTIAATYP | GASAETVENT |
| acin_baum_NIPH_290       | MAQFFIHRPI | FAWVIALVIM | LAGILTLTKM | PIAQYPTIAP | PTVTIAATYP | GASAETVENT |
| acin_baum_NIPH_329       | MAQFFIHRPI | FAWVIALVIM | LAGILTLTKM | PIAQYPTIAP | PTVTIAATYP | GASAETVENT |
| acin_baum_NIPH_335       | MAQFFIHRPI | FAWVIALVIM | LAGILTLTKM | PIAQYPTIAP | PTVTIAATYP | GASAETVENT |
| acin_baum_NIPH_410       | MAQFFIHRPI | FAWVIALVIM | LAGILTLTKM | PIAQYPTIAP | PTVTIAATYP | GASAETVENT |
| acin_baum_NIPH_527       | MAQFFIHRPI | FAWVIALVIM | LAGILTLTKM | PIAQYPTIAP | PTVTIAATYP | GASAETVENT |
| acin_baum_NIPH_528       | MAQFFIHRPI | FAWVIALVIM | LAGILTLTKM | PIAQYPTIAP | PTVTIAATYP | GASAETVENT |
| acin_baum_NIPH_60        | MAQFFIHRPI | FAWVIALVIM | LAGILTLTKM | PIAQYPTIAP | PTVTIAATYP | GASAETVENT |
| acin_baum_NIPH_601       | MAQFFIHRPI | FAWVIALVIM | LAGILTLTKM | PIAQYPTIAP | PTVTIAATYP | GASAETVENT |
| acin_baum_NIPH_615       | MAQFFIHRPI | FAWVIALVIM | LAGILTLTKM | PIAQYPTIAP | PTVTIAATYP | GASAETVENT |
| acin_baum_NIPH_67        | MAQFFIHRPI | FAWVIALVIM | LAGILTLTKM | PIAQYPTIAP | PTVTIAATYP | GASAETVENT |
| acin_baum_NIPH_70        | MAQFFIHRPI | FAWVIALVIM | LAGILTLTKM | PIAQYPTIAP | PTVTIAATYP | GASAETVENT |
| acin_baum_NIPH_80        | MAQFFIHRPI | FAWVIALVIM | LAGILTLTKM | PIAQYPTIAP | PTVTIAATYP | GASAETVENT |

|                          |             |            |            |            |            |            |
|--------------------------|-------------|------------|------------|------------|------------|------------|
| AdeJ_Pasteur             | VTQIIEQQMN  | GLDGLRYISS | NSAGNGQASI | QLNFEEQVDP | DIAQVQVQNK | LQSATALLPE |
| acin_baum_ANC_4097       | VTQIIEQQMN  | GLDGLRYISS | NSAGNGQASI | QLNFEEQVDP | DIAQVQVQNK | LQSATALLPE |
| acin_baum_AYE            | VTQIIEQQMN  | GLDGLRYISS | NSAGNGQASI | QLNFEEQVDP | DIAQVQVQNK | LQSATALLPE |
| acin_baum_BM4587         | VTQIIEQQMN  | GLDGLRYISS | NSAGNGQASI | QLNFEEQVDP | DIAQVQVQNK | LQSATALLPE |
| acin_baum_BM4701         | VTQIIEQQMN  | GLDGLRYISS | NSAGNGQASI | QLNFEEQVDP | DIAQVQVQNK | LQSATALLPE |
| acin_baum_BM4702         | VTQIIEQQMN  | GLDGLRYISS | NSAGNGQASI | QLNFEEQVDP | DIAQVQVQNK | LQSATALLPE |
| acin_baum_BM4703         | VTQIIEQQMN  | GLDGLRYISS | NSAGNGQASI | QLNFEEQVDP | DIAQVQVQNK | LQSATALLPE |
| acin_baum_BM4704         | VTQIIEQQMN  | GLDGLRYISS | NSAGNGQASI | QLNFEEQVDP | DIAQVQVQNK | LQSATALLPE |
| acin_baum_BM4705         | VT*IIIEQQMN | GLDGLRYISS | NSAGNGQASI | QLNFEEQVDP | DIAQVQVQNK | LQSATALLPE |
| acin_baum_BM4706         | VTQIIEQQMN  | GLDGLRYISS | NSAGNGQASI | QLNFEEQVDP | DIAQVQVQNK | LQSATALLPE |
| acin_baum_BM4707         | VTQIIEQQMN  | GLDGLRYISS | NSAGNGQASI | QLNFEEQVDP | DIAQVQVQNK | LQSATALLPE |
| acin_baum_BM4708         | VTQIIEQQMN  | GLDGLRYISS | NSAGNGQASI | QLNFEEQVDP | DIAQVQVQNK | LQSATALLPE |
| acin_baum_BM4709         | VTQIIEQQMN  | GLDGLRYISS | NSAGNGQASI | QLNFEEQVDP | DIAQVQVQNK | LQSATALLPE |
| acin_baum_BM4710         | VTQIIEQQMN  | GLDGLRYISS | NSAGNGQASI | QLNFEEQVDP | DIAQVQVQNK | LQSATALLPE |
| acin_baum_BM4711         | VTQIIEQQMN  | GLDGLRYISS | NSAGNGQASI | QLNFEEQVDP | DIAQVQVQNK | LQSATALLPE |
| acin_baum_BM4712         | VTQIIEQQMN  | GLDGLRYISS | NSAGNGQASI | QLNFEEQVDP | DIAQVQVQNK | LQSATALLPE |
| acin_baum_BM4713         | VTQIIEQQMN  | GLDGLRYISS | NSAGNGQASI | QLNFEEQVDP | DIAQVQVQNK | LQSATALLPE |
| acin_baum_BM4714         | VTQIIEQQMN  | GLDGLRYISS | NSAGNGQASI | QLNFEEQVDP | DIAQVQVQNK | LQSATALLPE |
| acin_baum_CIP_70_34t     | VTQIIEQQMN  | GLDGLRYISS | NSAGNGQASI | QLNFEEQVDP | DIAQVQVQNK | LQSATALLPE |
| acin_baum_MRSN_3405      | VTQIIEQQMN  | GLDGLRYISS | NSAGNGQASI | QLNFEEQVDP | DIAQVQVQNK | LQSATALLPE |
| acin_baum_NIPH_1362      | VTQIIEQQMN  | GLDGLRYISS | NSAGNGQASI | QLNFEEQVDP | DIAQVQVQNK | LQSATALLPE |
| acin_baum_NIPH_1362_redo | VTQIIEQQMN  | GLDGLRYISS | NSAGNGQASI | QLNFEEQVDP | DIAQVQVQNK | LQSATALLPE |
| acin_baum_NIPH_146       | VTQIIEQQMN  | GLDGLRYISS | NSAGNGQASI | QLNFEEQVDP | DIAQVQVQNK | LQSATALLPE |
| acin_baum_NIPH_1669      | VTQIIEQQMN  | GLDGLRYISS | NSAGNGQASI | QLNFEEQVDP | DIAQVQVQNK | LQSATALLPE |
| acin_baum_NIPH_1734      | VTQIIEQQMN  | GLDGLRYISS | NSAGNGQASI | QLNFEEQVDP | DIAQVQVQNK | LQSATALLPE |
| acin_baum_NIPH_190       | VTQIIEQQMN  | GLDGLRYISS | NSAGNGQASI | QLNFEEQVDP | DIAQVQVQNK | LQSATALLPE |
| acin_baum_NIPH_201       | VTQIIEQQMN  | GLDGLRYISS | NSAGNGQASI | QLNFEEQVDP | DIAQVQVQNK | LQSATALLPE |
| acin_baum_NIPH_2061      | VTQIIEQQMN  | GLDGLRYISS | NSAGNGQASI | QLNFEEQVDP | DIAQVQVQNK | LQSATALLPE |
| acin_baum_NIPH_24        | VTQIIEQQMN  | GLDGLRYISS | NSAGNGQASI | QLNFEEQVDP | DIAQVQVQNK | LQSATALLPE |
| acin_baum_NIPH_290       | VTQIIEQQMN  | GLDGLRYISS | NSAGNGQASI | QLNFEEQVDP | DIAQVQVQNK | LQSATALLPE |
| acin_baum_NIPH_329       | VTQIIEQQMN  | GLDGLRYISS | NSAGNGQASI | QLNFEEQVDP | DIAQVQVQNK | LQSATALLPE |
| acin_baum_NIPH_335       | VTQIIEQQMN  | GLDGLRYISS | NSAGNGQASI | QLNFEEQVDP | DIAQVQVQNK | LQSATALLPE |
| acin_baum_NIPH_410       | VTQIIEQQMN  | GLDGLRYISS | NSAGNGQASI | QLNFEEQVDP | DIAQVQVQNK | LQSATALLPE |
| acin_baum_NIPH_527       | VTQIIEQQMN  | GLDGLRYISS | NSAGNGQASI | QLNFEEQVDP | DIAQVQVQNK | LQSATALLPE |
| acin_baum_NIPH_528       | VTQIIEQQMN  | GLDGLRYISS | NSAGNGQASI | QLNFEEQVDP | DIAQVQVQNK | LQSATALLPE |
| acin_baum_NIPH_60        | VTQIIEQQMN  | GLDGLRYISS | NSAGNGQASI | QLNFEEQVDP | DIAQVQVQNK | LQSATALLPE |
| acin_baum_NIPH_601       | VTQIIEQQMN  | GLDGLRYISS | NSAGNGQASI | QLNFEEQVDP | DIAQVQVQNK | LQSATALLPE |
| acin_baum_NIPH_615       | VTQIIEQQMN  | GLDGLRYISS | NSAGNGQASI | QLNFEEQVDP | DIAQVQVQNK | LQSATALLPE |
| acin_baum_NIPH_67        | VTQIIEQQMN  | GLDGLRYISS | NSAGNGQASI | QLNFEEQVDP | DIAQVQVQNK | LQSATALLPE |
| acin_baum_NIPH_70        | VTQIIEQQMN  | GLDGLRYISS | NSAGNGQASI | QLNFEEQVDP | DIAQVQVQNK | LQSATALLPE |
| acin_baum_NIPH_80        | VTQIIEQQMN  | GLDGLRYISS | NSAGNGQASI | QLNFEEQVDP | DIAQVQVQNK | LQSATALLPE |



|                          |            |            |            |            |            |           |
|--------------------------|------------|------------|------------|------------|------------|-----------|
| AdeJ_Pasteur             | SYAMRIWLDP | AKLTSYQLTP | SDIATALQAQ | NSQVAVGQLG | GAPAVQGQVL | NATVNAQSL |
| acin_baum_ANC_4097       | SYAMRIWLDP | AKLTSYQLTP | SDIATALQAQ | NSQVAVGQLG | GAPAVQGQVL | NATVNAQSL |
| acin_baum_AYE            | SYAMRIWLDP | AKLTSYQLTP | SDIATALQAQ | NSQVAVGQLG | GAPAVQGQVL | NATVNAQSL |
| acin_baum_BM4587         | SYAMRIWLDP | AKLTSYQLTP | SDIATALQAQ | NSQVAVGQLG | GAPAVQGQVL | NATVNAQSL |
| acin_baum_BM4701         | SYAMRIWLDP | AKLTSYQLTP | SDIATALQAQ | NSQVAVGQLG | GAPAVQGQVL | NATVNAQSL |
| acin_baum_BM4702         | SYAMRIWLDP | AKLTSYQLTP | SDIATALQAQ | NSQVAVGQLG | GAPAVQGQVL | NATVNAQSL |
| acin_baum_BM4703         | SYAMRIWLDP | AKLTSYQLTP | SDIATALQAQ | NSQVAVGQLG | GAPAVQGQVL | NATVNAQSL |
| acin_baum_BM4704         | SYAMRIWLDP | AKLTSYQLTP | SDIATALQAQ | NSQVAVGQLG | GAPAVQGQVL | NATVNAQSL |
| acin_baum_BM4705         | SYAMRIWLDP | AKLTSYQLTP | SDIATALQAQ | NSQVAVGQLG | GAPAVQGQVL | NATVNAQSL |
| acin_baum_BM4706         | SYAMRIWLDP | AKLTSYQLTP | SDIATALQAQ | NSQVAVGQLG | GAPAVQGQVL | NATVNAQSL |
| acin_baum_BM4707         | SYAMRIWLDP | AKLTSYQLTP | SDIATALQAQ | NSQVAVGQLG | GAPAVQGQVL | NATVNAQSL |
| acin_baum_BM4708         | SYAMRIWLDP | AKLTSYQLTP | SDIATALQAQ | NSQVAVGQLG | GAPAVQGQVL | NATVNAQSL |
| acin_baum_BM4709         | SYAMRIWLDP | AKLTSYQLTP | SDIATALQAQ | NSQVAVGQLG | GAPAVQGQVL | NATVNAQSL |
| acin_baum_BM4710         | SYAMRIWLDP | AKLTSYQLTP | SDIATALQAQ | NSQVAVGQLG | GAPAVQGQVL | NATVNAQSL |
| acin_baum_BM4711         | SYAMRIWLDP | AKLTSYQLTP | SDIATALQAQ | NSQVAVGQLG | GAPAVQGQVL | NATVNAQSL |
| acin_baum_BM4712         | SYAMRIWLDP | AKLTSYQLTP | SDIATALQAQ | NSQVAVGQLG | GAPAVQGQVL | NATVNAQSL |
| acin_baum_BM4713         | SYAMRIWLDP | AKLTSYQLTP | SDIATALQAQ | NSQVAVGQLG | GAPAVQGQVL | NATVNAQSL |
| acin_baum_BM4714         | SYAMRIWLDP | AKLTSYQLTP | SDIATALQAQ | NSQVAVGQLG | GAPAVQGQVL | NATVNAQSL |
| acin_baum_CIP_70_34t     | SYAMRIWLDP | AKLTSYQLTP | SDIATALQAQ | NSQVAVGQLG | GAPAVQGQVL | NATVNAQSL |
| acin_baum_MRSN_3405      | SYAMRIWLDP | AKLTSYQLTP | SDIATALQAQ | NSQVAVGQLG | GAPAVQGQVL | NATVNAQSL |
| acin_baum_NIPH_1362      | SYAMRIWLDP | AKLTSYQLTP | SDIATALQAQ | NSQVAVGQLG | GAPAVQGQVL | NATVNAQSL |
| acin_baum_NIPH_1362_redo | SYAMRIWLDP | AKLTSYQLTP | SDIATALQAQ | NSQVAVGQLG | GAPAVQGQVL | NATVNAQSL |
| acin_baum_NIPH_146       | SYAMRIWLDP | AKLTSYQLTP | SDIATALQAQ | NSQVAVGQLG | GAPAVQGQVL | NATVNAQSL |
| acin_baum_NIPH_1669      | SYAMRIWLDP | AKLTSYQLTP | SDIATALQAQ | NSQVAVGQLG | GAPAVQGQVL | NATVNAQSL |
| acin_baum_NIPH_1734      | SYAMRIWLDP | AKLTSYQLTP | SDIATALQAQ | NSQVAVGQLG | GAPAVQGQVL | NATVNAQSL |
| acin_baum_NIPH_190       | SYAMRIWLDP | AKLTSYQLTP | SDIATALQAQ | NSQVAVGQLG | GAPAVQGQVL | NATVNAQSL |
| acin_baum_NIPH_201       | SYAMRIWLDP | AKLTSYQLTP | SDIATALQAQ | NSQVAVGQLG | GAPAVQGQVL | NATVNAQSL |
| acin_baum_NIPH_2061      | SYAMRIWLDP | AKLTSYQLTP | SDIATALQAQ | NSQVAVGQLG | GAPAVQGQVL | NATVNAQSL |
| acin_baum_NIPH_24        | SYAMRIWLDP | AKLTSYQLTP | SDIATALQAQ | NSQVAVGQLG | GAPAVQGQVL | NATVNAQSL |
| acin_baum_NIPH_290       | SYAMRIWLDP | AKLTSYQLTP | SDIATALQAQ | NSQVAVGQLG | GAPAVQGQVL | NATVNAQSL |
| acin_baum_NIPH_329       | SYAMRIWLDP | AKLTSYQLTP | SDIATALQAQ | NSQVAVGQLG | GAPAVQGQVL | NATVNAQSL |
| acin_baum_NIPH_335       | SYAMRIWLDP | AKLTSYQLTP | SDIATALQAQ | NSQVAVGQLG | GAPAVQGQVL | NATVNAQSL |
| acin_baum_NIPH_410       | SYAMRIWLDP | AKLTSYQLTP | SDIATALQAQ | NSQVAVGQLG | GAPAVQGQVL | NATVNAQSL |
| acin_baum_NIPH_527       | SYAMRIWLDP | AKLTSYQLTP | SDIATALQAQ | NSQVAVGQLG | GAPAVQGQVL | NATVNAQSL |
| acin_baum_NIPH_528       | SYAMRIWLDP | AKLTSYQLTP | SDIATALQAQ | NSQVAVGQLG | GAPAVQGQVL | NATVNAQSL |
| acin_baum_NIPH_60        | SYAMRIWLDP | AKLTSYQLTP | SDIATALQAQ | NSQVAVGQLG | GAPAVQGQVL | NATVNAQSL |
| acin_baum_NIPH_601       | SYAMRIWLDP | AKLTSYQLTP | SDIATALQAQ | NSQVAVGQLG | GAPAVQGQVL | NATVNAQSL |
| acin_baum_NIPH_615       | SYAMRIWLDP | AKLTSYQLTP | SDIATALQAQ | NSQVAVGQLG | GAPAVQGQVL | NATVNAQSL |
| acin_baum_NIPH_67        | SYAMRIWLDP | AKLTSYQLTP | SDIATALQAQ | NSQVAVGQLG | GAPAVQGQVL | NATVNAQSL |
| acin_baum_NIPH_70        | SYAMRIWLDP | AKLTSYQLTP | SDIATALQAQ | NSQVAVGQLG | GAPAVQGQVL | NATVNAQSL |
| acin_baum_NIPH_80        | SYAMRIWLDP | AKLTSYQLTP | SDIATALQAQ | NSQVAVGQLG | GAPAVQGQVL | NATVNAQSL |

|                          |            |            |            |            |            |            |
|--------------------------|------------|------------|------------|------------|------------|------------|
| AdeJ_Pasteur             | QTPEQFKNIF | LKNTASGAEV | RLKDVARVEL | GSDNYQFDSK | FNGKPAAGLA | IKIATGANAL |
| acin_baum_ANC_4097       | QTPEQFKNIF | LKNTASGAEV | RLKDVARVEL | GSDNYQFDSK | FNGKPAAGLA | IKIATGANAL |
| acin_baum_AYE            | QTPEQFKNIF | LKNTASGAEV | RLKDVARVEL | GSDNYQFDSK | FNGKPAAGLA | IKIATGANAL |
| acin_baum_BM4587         | QTPEQFKNIF | LKNTASGAEV | RLKDVARVEL | GSDNYQFDSK | FNGKPAAGLA | IKIATGANAL |
| acin_baum_BM4701         | QTPEQFKNIF | LKNTASGAEV | RLKDVARVEL | GSDNYQFDSK | FNGKPAAGLA | IKIATGANAL |
| acin_baum_BM4702         | QTPEQFKNIF | LKNTASGAEV | RLKDVARVEL | GSDNYQFDSK | FNGKPAAGLA | IKIATGANAL |
| acin_baum_BM4703         | QTPEQFKNIF | LKNTASGAEV | RLKDVARVEL | GSDNYQFDSK | FNGKPAAGLA | IKIATGANAL |
| acin_baum_BM4704         | QTPEQFKNIF | LKNTASGAEV | RLKDVARVEL | GSDNYQFDSK | FNGKPAAGLA | IKIATGANAL |
| acin_baum_BM4705         | QTPEQFKNIF | LKNTASGAEV | RLKDVARVEL | GSDNYQFDSK | FNGKPAAGLA | IKIATGANAL |
| acin_baum_BM4706         | QTPEQFKNIF | LKNTASGAEV | RLKDVARVEL | GSDNYQFDSK | FNGKPAAGLA | IKIATGANAL |
| acin_baum_BM4707         | QTPEQFKNIF | LKNTASGAEV | RLKDVARVEL | GSDNYQFDSK | FNGKPAAGLA | IKIATGANAL |
| acin_baum_BM4708         | QTPEQFKNIF | LKNTASGAEV | RLKDVARVEL | GSDNYQFDSK | FNGKPAAGLA | IKIATGANAL |
| acin_baum_BM4709         | QTPEQFKNIF | LKNTASGAEV | RLKDVARVEL | GSDNYQFDSK | FNGKPAAGLA | IKIATGANAL |
| acin_baum_BM4710         | QTPEQFKNIF | LKNTASGAEV | RLKDVARVEL | GSDNYQFDSK | FNGKPAAGLA | IKIATGANAL |
| acin_baum_BM4711         | QTPEQFKNIF | LKNTASGAEV | RLKDVARVEL | GSDNYQFDSK | FNGKPAAGLA | IKIATGANAL |
| acin_baum_BM4712         | QTPEQFKNIF | LKNTASGAEV | RLKDVARVEL | GSDNYQFDSK | FNGKPAAGLA | IKIATGANAL |
| acin_baum_BM4713         | QTPEQFKNIF | LKNTASGAEV | RLKDVARVEL | GSDNYQFDSK | FNGKPAAGLA | IKIATGANAL |
| acin_baum_BM4714         | QTPEQFKNIF | LKNTASGAEV | RLKDVARVEL | GSDNYQFDSK | FNGKPAAGLA | IKIATGANAL |
| acin_baum_CIP_70_34t     | QTPEQFKNIF | LKNTASGAEV | RLKDVARVEL | GSDNYQFDSK | FNGKPAAGLA | IKIATGANAL |
| acin_baum_MRSN_3405      | QTPEQFKNIF | LKNTASGAEV | RLKDVARVEL | GSDNYQFDSK | FNGKPAAGLA | IKIATGANAL |
| acin_baum_NIPH_1362      | QTPEQFKNIF | LKNTASGAEV | RLKDVARVEL | GSDNYQFDSK | FNGKPAAGLA | IKIATGANAL |
| acin_baum_NIPH_1362_redo | QTPEQFKNIF | LKNTASGAEV | RLKDVARVEL | GSDNYQFDSK | FNGKPAAGLA | IKIATGANAL |
| acin_baum_NIPH_146       | QTPEQFKNIF | LKNTASGAEV | RLKDVARVEL | GSDNYQFDSK | FNGKPAAGLA | IKIATGANAL |
| acin_baum_NIPH_1669      | QTPEQFKNIF | LKNTASGAEV | RLKDVARVEL | GSDNYQFDSK | FNGKPAAGLA | IKIATGANAL |
| acin_baum_NIPH_1734      | QTPEQFKNIF | LKNTASGAEV | RLKDVARVEL | GSDNYQFDSK | FNGKPAAGLA | IKIATGANAL |
| acin_baum_NIPH_190       | QTPEQFKNIF | LKNTASGAEV | RLKDVARVEL | GSDNYQFDSK | FNGKPAAGLA | IKIATGANAL |
| acin_baum_NIPH_201       | QTPEQFKNIF | LKNTASGAEV | RLKDVARVEL | GSDNYQFDSK | FNGKPAAGLA | IKIATGANAL |
| acin_baum_NIPH_2061      | QTPEQFKNIF | LKNTASGAEV | RLKDVARVEL | GSDNYQFDSK | FNGKPAAGLA | IKIATGANAL |
| acin_baum_NIPH_24        | QTPEQFKNIF | LKNTASGAEV | RLKDVARVEL | GSDNYQFDSK | FNGKPAAGLA | IKIATGANAL |
| acin_baum_NIPH_290       | QTPEQFKNIF | LKNTASGAEV | RLKDVARVEL | GSDNYQFDSK | FNGKPAAGLA | IKIATGANAL |
| acin_baum_NIPH_329       | QTPEQFKNIF | LKNTASGAEV | RLKDVARVEL | GSDNYQFDSK | FNGKPAAGLA | IKIATGANAL |
| acin_baum_NIPH_335       | QTPEQFKNIF | LKNTASGAEV | RLKDVARVEL | GSDNYQFDSK | FNGKPAAGLA | IKIATGANAL |
| acin_baum_NIPH_410       | QTPEQFKNIF | LKNTASGAEV | RLKDVARVEL | GSDNYQFDSK | FNGKPAAGLA | IKIATGANAL |
| acin_baum_NIPH_527       | QTPEQFKNIF | LKNTASGAEV | RLKDVARVEL | GSDNYQFDSK | FNGKPAAGLA | IKIATGANAL |
| acin_baum_NIPH_528       | QTPEQFKNIF | LKNTASGAEV | RLKDVARVEL | GSDNYQFDSK | FNGKPAAGLA | IKIATGANAL |
| acin_baum_NIPH_60        | QTPEQFKNIF | LKNTASGAEV | RLKDVARVEL | GSDNYQFDSK | FNGKPAAGLA | IKIATGANAL |
| acin_baum_NIPH_601       | QTPEQFKNIF | LKNTASGAEV | RLKDVARVEL | GSDNYQFDSK | FNGKPAAGLA | IKIATGANAL |
| acin_baum_NIPH_615       | QTPEQFKNIF | LKNTASGAEV | RLKDVARVEL | GSDNYQFDSK | FNGKPAAGLA | IKIATGANAL |
| acin_baum_NIPH_67        | QTPEQFKNIF | LKNTASGAEV | RLKDVARVEL | GSDNYQFDSK | FNGKPAAGLA | IKIATGANAL |
| acin_baum_NIPH_70        | QTPEQFKNIF | LKNTASGAEV | RLKDVARVEL | GSDNYQFDSK | FNGKPAAGLA | IKIATGANAL |
| acin_baum_NIPH_80        | QTPEQFKNIF | LKNTASGAEV | RLKDVARVEL | GSDNYQFDSK | FNGKPAAGLA | IKIATGANAL |

|                          |            |            |            |            |            |            |
|--------------------------|------------|------------|------------|------------|------------|------------|
| AdeJ_Pasteur             | DTAEAVEQRL | SELRKNYPTG | LADKLAYDTT | PFIRLSIESV | VHTLIEAVIL | VFIVMFLFLQ |
| acin_baum_ANC_4097       | DTAEAVEQRL | SELRKNYPTG | LADKLAYDTT | PFIRLSIESV | VHTLIEAVIL | VFIVMFLFLQ |
| acin_baum_AYE            | DTAEAVEQRL | SELRKNYPTG | LADKLAYDTT | PFIRLSIESV | VHTLIEAVIL | VFIVMFLFLQ |
| acin_baum_BM4587         | DTAEAVEQRL | SELRKNYPTG | LADKLAYDTT | PFIRLSIESV | VHTLIEAVIL | VFIVMFLFLQ |
| acin_baum_BM4701         | DTAEAVEQRL | SELRKNYPTG | LADKLAYDTT | PFIRLSIESV | VHTLIEAVIL | VFIVMFLFLQ |
| acin_baum_BM4702         | DTAEAVEQRL | SELRKNYPTG | LADKLAYDTT | PFIRLSIESV | VHTLIEAVIL | VFIVMFLFLQ |
| acin_baum_BM4703         | DTAEAVEQRL | SELRKNYPTG | LADKLAYDTT | PFIRLSIESV | VHTLIEAVIL | VFIVMFLFLQ |
| acin_baum_BM4704         | DTAEAVEQRL | SELRKNYPTG | LADKLAYDTT | PFIRLSIESV | VHTLIEAVIL | VFIVMFLFLQ |
| acin_baum_BM4705         | DTAEAVEQRL | SELRKNYPTG | LADKLAYDTT | PFIRLSIESV | VHTLIEAVIL | VFIVMFLFLQ |
| acin_baum_BM4706         | DTAEAVEQRL | SELRKNYPTG | LADKLAYDTT | PFIRLSIESV | VHTLIEAVIL | VFIVMFLFLQ |
| acin_baum_BM4707         | DTAEAVEQRL | SELRKNYPTG | LADKLAYDTT | PFIRLSIESV | VHTLIEAVIL | VFIVMFLFLQ |
| acin_baum_BM4708         | DTAEAVEQRL | SELRKNYPTG | LADKLAYDTT | PFIRLSIESV | VHTLIEAVIL | VFIVMFLFLQ |
| acin_baum_BM4709         | DTAEAVEQRL | SELRKNYPTG | LADKLAYDTT | PFIRLSIESV | VHTLIEAVIL | VFIVMFLFLQ |
| acin_baum_BM4710         | DTAEAVEQRL | SELRKNYPTG | LADKLAYDTT | PFIRLSIESV | VHTLIEAVIL | VFIVMFLFLQ |
| acin_baum_BM4711         | DTAEAVEQRL | SELRKNYPTG | LADKLAYDTT | PFIRLSIESV | VHTLIEAVIL | VFIVMFLFLQ |
| acin_baum_BM4712         | DTAEAVEQRL | SELRKNYPTG | LADKLAYDTT | PFIRLSIESV | VHTLIEAVIL | VFIVMFLFLQ |
| acin_baum_BM4713         | DTAEAVEQRL | SELRKNYPTG | LADKLAYDTT | PFIRLSIESV | VHTLIEAVIL | VFIVMFLFLQ |
| acin_baum_BM4714         | DTAEAVEQRL | SELRKNYPTG | LADKLAYDTT | PFIRLSIESV | VHTLIEAVIL | VFIVMFLFLQ |
| acin_baum_CIP_70_34t     | DTAEAVEQRL | SELRKNYPTG | LADKLAYDTT | PFIRLSIESV | VHTLIEAVIL | VFIVMFLFLQ |
| acin_baum_MRSN_3405      | DTAEAVEQRL | SELRKNYPTG | LADKLAYDTT | PFIRLSIESV | VHTLIEAVIL | VFIVMFLFLQ |
| acin_baum_NIPH_1362      | DTAEAVEQRL | SELRKNYPTG | LADKLAYDTT | PFIRLSIESV | VHTLIEAVIL | VFIVMFLFLQ |
| acin_baum_NIPH_1362_redo | DTAEAVEQRL | SELRKNYPTG | LADKLAYDTT | PFIRLSIESV | VHTLIEAVIL | VFIVMFLFLQ |
| acin_baum_NIPH_146       | DTAEAVEQRL | SELRKNYPTG | LADKLAYDTT | PFIRLSIESV | VHTLIEAVIL | VFIVMFLFLQ |
| acin_baum_NIPH_1669      | DTAEAVEQRL | SELRKNYPTG | LADKLAYDTT | PFIRLSIESV | VHTLIEAVIL | VFIVMFLFLQ |
| acin_baum_NIPH_1734      | DTAEAVEQRL | SELRKNYPTG | LADKLAYDTT | PFIRLSIESV | VHTLIEAVIL | VFIVMFLFLQ |
| acin_baum_NIPH_190       | DTAEAVEQRL | SELRKNYPTG | LADKLAYDTT | PFIRLSIESV | VHTLIEAVIL | VFIVMFLFLQ |
| acin_baum_NIPH_201       | DTAEAVEQRL | SELRKNYPTG | LADKLAYDTT | PFIRLSIESV | VHTLIEAVIL | VFIVMFLFLQ |
| acin_baum_NIPH_2061      | DTAEAVEQRL | SELRKNYPTG | LADKLAYDTT | PFIRLSIESV | VHTLIEAVIL | VFIVMFLFLQ |
| acin_baum_NIPH_24        | DTAEAVEQRL | SELRKNYPTG | LADKLAYDTT | PFIRLSIESV | VHTLIEAVIL | VFIVMFLFLQ |
| acin_baum_NIPH_290       | DTAEAVEQRL | SELRKNYPTG | LADKLAYDTT | PFIRLSIESV | VHTLIEAVIL | VFIVMFLFLQ |
| acin_baum_NIPH_329       | DTAEAVEQRL | SELRKNYPTG | LADKLAYDTT | PFIRLSIESV | VHTLIEAVIL | VFIVMFLFLQ |
| acin_baum_NIPH_335       | DTAEAVEQRL | SELRKNYPTG | LADKLAYDTT | PFIRLSIESV | VHTLIEAVIL | VFIVMFLFLQ |
| acin_baum_NIPH_410       | DTAEAVEQRL | SELRKNYPTG | LADKLAYDTT | PFIRLSIESV | VHTLIEAVIL | VFIVMFLFLQ |
| acin_baum_NIPH_527       | DTAEAVEQRL | SELRKNYPTG | LADKLAYDTT | PFIRLSIESV | VHTLIEAVIL | VFIVMFLFLQ |
| acin_baum_NIPH_528       | DTAEAVEQRL | SELRKNYPTG | LADKLAYDTT | PFIRLSIESV | VHTLIEAVIL | VFIVMFLFLQ |
| acin_baum_NIPH_60        | DTAEAVEQRL | SELRKNYPTG | LADKLAYDTT | PFIRLSIESV | VHTLIEAVIL | VFIVMFLFLQ |
| acin_baum_NIPH_601       | DTAEAVEQRL | SELRKNYPTG | LADKLAYDTT | PFIRLSIESV | VHTLIEAVIL | VFIVMFLFLQ |
| acin_baum_NIPH_615       | DTAEAVEQRL | SELRKNYPTG | LADKLAYDTT | PFIRLSIESV | VHTLIEAVIL | VFIVMFLFLQ |
| acin_baum_NIPH_67        | DTAEAVEQRL | SELRKNYPTG | LADKLAYDTT | PFIRLSIESV | VHTLIEAVIL | VFIVMFLFLQ |
| acin_baum_NIPH_70        | DTAEAVEQRL | SELRKNYPTG | LADKLAYDTT | PFIRLSIESV | VHTLIEAVIL | VFIVMFLFLQ |
| acin_baum_NIPH_80        | DTAEAVEQRL | SELRKNYPTG | LADKLAYDTT | PFIRLSIESV | VHTLIEAVIL | VFIVMFLFLQ |

|                          |            |            |            |           |            |            |
|--------------------------|------------|------------|------------|-----------|------------|------------|
| AdeJ_Pasteur             | NWRATIIPTL | AVPVVVLGTF | AVINIFGFSI | NLTMFAMVL | AIGLLVDDAI | VVVENVERVM |
| acin_baum_ANC_4097       | NWRATIIPTL | AVPVVVLGTF | AVINIFGFSI | NLTMFAMVL | AIGLLVDDAI | VVVENVERVM |
| acin_baum_AYE            | NWRATIIPTL | AVPVVVLGTF | AVINIFGFSI | NLTMFAMVL | AIGLLVDDAI | VVVENVERVM |
| acin_baum_BM4587         | NWRATIIPTL | AVPVVVLGTF | AVINIFGFSI | NLTMFAMVL | AIGLLVDDAI | VVVENVERVM |
| acin_baum_BM4701         | NWRATIIPTL | AVPVVVLGTF | AVINIFGFSI | NLTMFAMVL | AIGLLVDDAI | VVVENVERVM |
| acin_baum_BM4702         | NWRATIIPTL | AVPVVVLGTF | AVINIFGFSI | NLTMFAMVL | AIGLLVDDAI | VVVENVERVM |
| acin_baum_BM4703         | NWRATIIPTL | AVPVVVLGTF | AVINIFGFSI | NLTMFAMVL | AIGLLVDDAI | VVVENVERVM |
| acin_baum_BM4704         | NWRATIIPTL | AVPVVVLGTF | AVINIFGFSI | NLTMFAMVL | AIGLLVDDAI | VVVENVERVM |
| acin_baum_BM4705         | NWRATIIPTL | AVPVVVLGTF | AVINIFGFSI | NLTMFAMVL | AIGLLVDDAI | VVVENVERVM |
| acin_baum_BM4706         | NWRATIIPTL | AVPVVVLGTF | AVINIFGFSI | NLTMFAMVL | AIGLLVDDAI | VVVENVERVM |
| acin_baum_BM4707         | NWRATIIPTL | AVPVVVLGTF | AVINIFGFSI | NLTMFAMVL | AIGLLVDDAI | VVVENVERVM |
| acin_baum_BM4708         | NWRATIIPTL | AVPVVVLGTF | AVINIFGFSI | NLTMFAMVL | AIGLLVDDAI | VVVENVERVM |
| acin_baum_BM4709         | NWRATIIPTL | AVPVVVLGTF | AVINIFGFSI | NLTMFAMVL | AIGLLVDDAI | VVVENVERVM |
| acin_baum_BM4710         | NWRATIIPTL | AVPVVVLGTF | AVINIFGFSI | NLTMFAMVL | AIGLLVDDAI | VVVENVERVM |
| acin_baum_BM4711         | NWRATIIPTL | AVPVVVLGTF | AVINIFGFSI | NLTMFAMVL | AIGLLVDDAI | VVVENVERVM |
| acin_baum_BM4712         | NWRATIIPTL | AVPVVVLGTF | AVINIFGFSI | NLTMFAMVL | AIGLLVDDAI | VVVENVERVM |
| acin_baum_BM4713         | NWRATIIPTL | AVPVVVLGTF | AVINIFGFSI | NLTMFAMVL | AIGLLVDDAI | VVVENVERVM |
| acin_baum_BM4714         | NWRATIIPTL | AVPVVVLGTF | AVINIFGFSI | NLTMFAMVL | AIGLLVDDAI | VVVENVERVM |
| acin_baum_CIP_70_34t     | NWRATIIPTL | AVPVVVLGTF | AVINIFGFSI | NLTMFAMVL | AIGLLVDDAI | VVVENVERVM |
| acin_baum_MRSN_3405      | NWRATIIPTL | AVPVVVLGTF | AVINIFGFSI | NLTMFAMVL | AIGLLVDDAI | VVVENVERVM |
| acin_baum_NIPH_1362      | NWRATIIPTL | AVPVVVLGTF | AVINIFGFSI | NLTMFAMVL | AIGLLVDDAI | VVVENVERVM |
| acin_baum_NIPH_1362_redo | NWRATIIPTL | AVPVVVLGTF | AVINIFGFSI | NLTMFAMVL | AIGLLVDDAI | VVVENVERVM |
| acin_baum_NIPH_146       | NWRATIIPTL | AVPVVVLGTF | AVINIFGFSI | NLTMFAMVL | AIGLLVDDAI | VVVENVERVM |
| acin_baum_NIPH_1669      | NWRATIIPTL | AVPVVVLGTF | AVINIFGFSI | NLTMFAMVL | AIGLLVDDAI | VVVENVERVM |
| acin_baum_NIPH_1734      | NWRATIIPTL | AVPVVVLGTF | AVINIFGFSI | NLTMFAMVL | AIGLLVDDAI | VVVENVERVM |
| acin_baum_NIPH_190       | NWRATIIPTL | AVPVVVLGTF | AVINIFGFSI | NLTMFAMVL | AIGLLVDDAI | VVVENVERVM |
| acin_baum_NIPH_201       | NWRATIIPTL | AVPVVVLGTF | AVINIFGFSI | NLTMFAMVL | AIGLLVDDAI | VVVENVERVM |
| acin_baum_NIPH_2061      | NWRATIIPTL | AVPVVVLGTF | AVINIFGFSI | NLTMFAMVL | AIGLLVDDAI | VVVENVERVM |
| acin_baum_NIPH_24        | NWRATIIPTL | AVPVVVLGTF | AVINIFGFSI | NLTMFAMVL | AIGLLVDDAI | VVVENVERVM |
| acin_baum_NIPH_290       | NWRATIIPTL | AVPVVVLGTF | AVINIFGFSI | NLTMFAMVL | AIGLLVDDAI | VVVENVERVM |
| acin_baum_NIPH_329       | NWRATIIPTL | AVPVVVLGTF | AVINIFGFSI | NLTMFAMVL | AIGLLVDDAI | VVVENVERVM |
| acin_baum_NIPH_335       | NWRATIIPTL | AVPVVVLGTF | AVINIFGFSI | NLTMFAMVL | AIGLLVDDAI | VVVENVERVM |
| acin_baum_NIPH_410       | NWRATIIPTL | AVPVVVLGTF | AVINIFGFSI | NLTMFAMVL | AIGLLVDDAI | VVVENVERVM |
| acin_baum_NIPH_527       | NWRATIIPTL | AVPVVVLGTF | AVINIFGFSI | NLTMFAMVL | AIGLLVDDAI | VVVENVERVM |
| acin_baum_NIPH_528       | NWRATIIPTL | AVPVVVLGTF | AVINIFGFSI | NLTMFAMVL | AIGLLVDDAI | VVVENVERVM |
| acin_baum_NIPH_60        | NWRATIIPTL | AVPVVVLGTF | AVINIFGFSI | NLTMFAMVL | AIGLLVDDAI | VVVENVERVM |
| acin_baum_NIPH_601       | NWRATIIPTL | AVPVVVLGTF | AVINIFGFSI | NLTMFAMVL | AIGLLVDDAI | VVVENVERVM |
| acin_baum_NIPH_615       | NWRATIIPTL | AVPVVVLGTF | AVINIFGFSI | NLTMFAMVL | AIGLLVDDAI | VVVENVERVM |
| acin_baum_NIPH_67        | NWRATIIPTL | AVPVVVLGTF | AVINIFGFSI | NLTMFAMVL | AIGLLVDDAI | VVVENVERVM |
| acin_baum_NIPH_70        | NWRATIIPTL | AVPVVVLGTF | AVINIFGFSI | NLTMFAMVL | AIGLLVDDAI | VVVENVERVM |
| acin_baum_NIPH_80        | NWRATIIPTL | AVPVVVLGTF | AVINIFGFSI | NLTMFAMVL | AIGLLVDDAI | VVVENVERVM |



|                          |            |            |            |            |            |            |
|--------------------------|------------|------------|------------|------------|------------|------------|
| AdeJ_Pasteur             | SEDHTDPVTA | TSRSMQQISG | ALVGITSVLT | AVFVPMAFFG | GTTGVIYRQF | SITLVTAMVL |
| acin_baum_ANC_4097       | SEDHTDPVTA | TSRSMQQISG | ALVGITSVLT | AVFVPMAFFG | GTTGVIYRQF | SITLVTAMVL |
| acin_baum_AYE            | SEDHTDPVTA | TSRSMQQISG | ALVGITSVLT | AVFVPMAFFG | GTTGVIYRQF | SITLVTAMVL |
| acin_baum_BM4587         | SEDHTDPVTA | TSRSMQQISG | ALVGITSVLT | AVFVPMAFFG | GTTGVIYRQF | SITLVTAMVL |
| acin_baum_BM4701         | SEDHTDPVNA | TSRSMQQISG | ALVGITSVLT | AVFVPMAFFG | GTTGVIYRQF | SITLVTAMVL |
| acin_baum_BM4702         | SEDHTDPVNA | TSRSMQQISG | ALVGITSVLT | AVFVPMAFFG | GTTGVIYRQF | SITLVTAMVL |
| acin_baum_BM4703         | SEDHTDPVTA | TSRSMQQISG | ALVGITSVLT | AVFVPMAFFG | GTTGVIYRQF | SITLVTAMVL |
| acin_baum_BM4704         | SEDHTDPVTA | TSRSMQQISG | ALVGITSVLT | AVFVPMAFFG | GTTGVIYRQF | SITLVTAMVL |
| acin_baum_BM4705         | SEDHTDPVTA | TSRSMQQISG | ALVGITSVLT | AVFVPMAFFG | GTTGVIYRQF | SITLVTAMVL |
| acin_baum_BM4706         | SEDHTDPVTA | TSRSMQQISG | ALVGITSVLT | AVFVPMAFFG | GTTGVIYRQF | SITLVTAMVL |
| acin_baum_BM4707         | SEDHTDPVTA | TSRSMQQISG | ALVGITSVLT | AVFVPMAFFG | GTTGVIYRQF | SITLVTAMVL |
| acin_baum_BM4708         | SEDHTDPVTA | TSRSMQQISG | ALVGITSVLT | AVFVPMAFFG | GTTGVIYRQF | SITLVTAMVL |
| acin_baum_BM4709         | SEDHTDPVTA | TSRSMQQISG | ALVGITSVLT | AVFVPMAFFG | GTTGVIYRQF | SITLVTAMVL |
| acin_baum_BM4710         | SEDHTDPVTA | TSRSMQQISG | ALVGITSVLT | AVFVPMAFFG | GTTGVIYRQF | SITLVTAMVL |
| acin_baum_BM4711         | SEDHTDPVTA | TSRSMQQISG | ALVGITSVLT | AVFVPMAFFG | GTTGVIYRQF | SITLVTAMVL |
| acin_baum_BM4712         | SEDHTDPVTA | TSRSMQQISG | ALVGITSVLT | AVFVPMAFFG | GTTGVIYRQF | SITLVTAMVL |
| acin_baum_BM4713         | SEDHTDPVTA | TSRSMQQISG | ALVGITSVLT | AVFVPMAFFG | GTTGVIYRQF | SITLVTAMVL |
| acin_baum_BM4714         | SEDHTDPVTA | TSRSMQQISG | ALVGITSVLT | AVFVPMAFFG | GTTGVIYRQF | SITLVTAMVL |
| acin_baum_CIP_70_34t     | SEDHTDPVTA | TSRSMQQISG | ALVGITSVLT | AVFVPMAFFG | GTTGVIYRQF | SITLVTAMVL |
| acin_baum_MRSN_3405      | SEDHTDPVTA | TSRSMQQISG | ALVGITSVLT | AVFVPMAFFG | GTTGVIYRQF | SITLVTAMVL |
| acin_baum_NIPH_1362      | SEDHTDPVTA | TSRSMQQISG | ALVGITSVLT | AVFVPMAFFG | GTTGVIYRQF | SITLVTAMVL |
| acin_baum_NIPH_1362_redo | SEDHTDPVTA | TSRSMQQISG | ALVGITSVLT | AVFVPMAFFG | GTTGVIYRQF | SITLVTAMVL |
| acin_baum_NIPH_146       | SEDHTDPVTA | TSRSMQQISG | ALVGITSVLT | AVFVPMAFFG | GTTGVIYRQF | SITLVTAMVL |
| acin_baum_NIPH_1669      | SEDHTDPVTA | TSRSMQQISG | ALVGITSVLT | AVFVPMAFFG | GTTGVIYRQF | SITLVTAMVL |
| acin_baum_NIPH_1734      | SEDHTDPVTA | TSRSMQQISG | ALVGITSVLT | AVFVPMAFFG | GTTGVIYRQF | SITLVTAMVL |
| acin_baum_NIPH_190       | SEDHTDPVTA | TSRSMQQISG | ALVGITSVLT | AVFVPMAFFG | GTTGVIYRQF | SITLVTAMVL |
| acin_baum_NIPH_201       | SEDHTDPVTA | TSRSMQQISG | ALVGITSVLT | AVFVPMAFFG | GTTGVIYRQF | SITLVTAMVL |
| acin_baum_NIPH_2061      | SEDHTDPVTA | TSRSMQQISG | ALVGITSVLT | AVFVPMAFFG | GTTGVIYRQF | SITLVTAMVL |
| acin_baum_NIPH_24        | SEDHTDPVTA | TSRSMQQISG | ALVGITSVLT | AVFVPMAFFG | GTTGVIYRQF | SITLVTAMVL |
| acin_baum_NIPH_290       | SEDHTDPVTA | TSRSMQQISG | ALVGITSVLT | AVFVPMAFFG | GTTGVIYRQF | SITLVTAMVL |
| acin_baum_NIPH_329       | SEDHTDPVTA | TSRSMQQISG | ALVGITSVLT | AVFVPMAFFG | GTTGVIYRQF | SITLVTAMVL |
| acin_baum_NIPH_335       | SEDHTDPVTA | TSRSMQQISG | ALVGITSVLT | AVFVPMAFFG | GTTGVIYRQF | SITLVTAMVL |
| acin_baum_NIPH_410       | SEDHTDPVTA | TSRSMQQISG | ALVGITSVLT | AVFVPMAFFG | GTTGVIYRQF | SITLVTAMVL |
| acin_baum_NIPH_527       | SEDHTDPVTA | TSRSMQQISG | ALVGITSVLT | AVFVPMAFFG | GTTGVIYRQF | SITLVTAMVL |
| acin_baum_NIPH_528       | SEDHTDPVTA | TSRSMQQISG | ALVGITSVLT | AVFVPMAFFG | GTTGVIYRQF | SITLVTAMVL |
| acin_baum_NIPH_60        | SEDHTDPVTA | TSRSMQQISG | ALVGITSVLT | AVFVPMAFFG | GTTGVIYRQF | SITLVTAMVL |
| acin_baum_NIPH_601       | SEDHTDPVTA | TSRSMQQISG | ALVGITSVLT | AVFVPMAFFG | GTTGVIYRQF | SITLVTAMVL |
| acin_baum_NIPH_615       | SEDHTDPVTA | TSRSMQQISG | ALVGITSVLT | AVFVPMAFFG | GTTGVIYRQF | SITLVTAMVL |
| acin_baum_NIPH_67        | SEDHTDPVTA | TSRSMQQISG | ALVGITSVLT | AVFVPMAFFG | GTTGVIYRQF | SITLVTAMVL |
| acin_baum_NIPH_70        | SEDHTDPVTA | TSRSMQQISG | ALVGITSVLT | AVFVPMAFFG | GTTGVIYRQF | SITLVTAMVL |
| acin_baum_NIPH_80        | SEDHTDPVTA | TSRSMQQISG | ALVGITSVLT | AVFVPMAFFG | GTTGVIYRQF | SITLVTAMVL |







|                          |            |            |            |            |            |           |
|--------------------------|------------|------------|------------|------------|------------|-----------|
| AdeJ_Pasteur             | MNEKDTVESI | FTVSGFSFTG | VGQNAGIGFV | KLKDWSKRIT | PETQIGSLIQ | RGMALNMIK |
| acin_baum_ANC_4097       | MNEKDTVESI | FTVSGFSFTG | VGQNAGIGFV | KLKDWSKRIT | PETQIGSLIQ | RGMALNMIK |
| acin_baum_AYE            | MNEKDTVESI | FTVSGFSFTG | VGQNAGIGFV | KLKDWSKRIT | PETQIGSLIQ | RGMALNMIK |
| acin_baum_BM4587         | MNEKDTVESI | FTVSGFSFTG | VGQNAGIGFV | KLKDWSKRIT | PETQIGSLIQ | RGMALNMIK |
| acin_baum_BM4701         | MNEKDTVESI | FTVSGFSFTG | VGQNAGIGFV | KLKDWSKRIT | PETQIGSLIQ | RGMALNMIK |
| acin_baum_BM4702         | MNEKDTVESI | FTVSGFSFTG | VGQNAGIGFV | KLKDWSKRIT | PETQIGSLIQ | RGMALNMIK |
| acin_baum_BM4703         | MNEKDTVESI | FTVSGFSFTG | VGQNAGIGFV | KLKDWSKRIT | PETQIGSLIQ | RGMALNMIK |
| acin_baum_BM4704         | MNEKDTVESI | FTVSGFSFTG | VGQNAGIGFV | KLKDWSKRIT | PETQIGSLIQ | RGMALNMIK |
| acin_baum_BM4705         | MNEKDTVESI | FTVSGFSFTG | VGQNAGIGFV | KLKDWSKRIT | PETQIGSLIQ | RGMALNMIK |
| acin_baum_BM4706         | MNEKDTVESI | FTVSGFSFTG | VGQNAGIGFV | KLKDWSKRIT | PETQIGSLIQ | RGMALNMIK |
| acin_baum_BM4707         | MNEKDTVESI | FTVSGFSFTG | VGQNAGIGFV | KLKDWSKRIT | PETQIGSLIQ | RGMALNMIK |
| acin_baum_BM4708         | MNEKDTVESI | FTVSGFSFTG | VGQNAGIGFV | KLKDWSKRIT | PETQIGSLIQ | RGMALNMIK |
| acin_baum_BM4709         | MNEKDTVESI | FTVSGFSFTG | VGQNAGIGFV | KLKDWSKRIT | PETQIGSLIQ | RGMALNMIK |
| acin_baum_BM4710         | MNEKDTVESI | FTVSGFSFTG | VGQNAGIGFV | KLKDWSKRIT | PETQIGSLIQ | RGMALNMIK |
| acin_baum_BM4711         | MNEKDTVESI | FTVSGFSFTG | VGQNAGIGFV | KLKDWSKRIT | PETQIGSLIQ | RGMALNMIK |
| acin_baum_BM4712         | MNEKDTVESI | FTVSGFSFTG | VGQNAGIGFV | KLKDWSKRIT | PETQIGSLIQ | RGMALNMIK |
| acin_baum_BM4713         | MNEKDTVESI | FTVSGFSFTG | VGQNAGIGFV | KLKDWSKRIT | PETQIGSLIQ | RGMALNMIK |
| acin_baum_BM4714         | MNEKDTVESI | FTVSGFSFTG | VGQNAGIGFV | KLKDWSKRIT | PETQIGSLIQ | RGMALNMIK |
| acin_baum_CIP_70_34t     | MNEKDTVESI | FTVSGFSFTG | VGQNAGIGFV | KLKDWSKRIT | PETQIGSLIQ | RGMALNMIK |
| acin_baum_MRSN_3405      | MNEKDTVESI | FTVSGFSFTG | VGQNAGIGFV | KLKDWSKRIT | PETQIGSLIQ | RGMALNMIK |
| acin_baum_NIPH_1362      | MNEKDTVESI | FTVSGFSFTG | VGQNAGIGFV | KLKDWSKRIT | PETQIGSLIQ | RGMALNMIK |
| acin_baum_NIPH_1362_redo | MNEKDTVESI | FTVSGFSFTG | VGQNAGIGFV | KLKDWSKRIT | PETQIGSLIQ | RGMALNMIK |
| acin_baum_NIPH_146       | MNEKDTVESI | FTVSGFSFTG | VGQNAGIGFV | KLKDWSKRIT | PETQIGSLIQ | RGMALNMIK |
| acin_baum_NIPH_1669      | MNEKDTVESI | FTVSGFSFTG | VGQNAGIGFV | KLKDWSKRIT | PETQIGSLIQ | RGMALNMIK |
| acin_baum_NIPH_1734      | MNEKDTVESI | FTVSGFSFTG | VGQNAGIGFV | KLKDWSKRIT | PETQIGSLIQ | RGMALNMIK |
| acin_baum_NIPH_190       | MNEKDTVESI | FTVSGFSFTG | VGQNAGIGFV | KLKDWSKRIT | PETQIGSLIQ | RGMALNMIK |
| acin_baum_NIPH_201       | MNEKDTVESI | FTVSGFSFTG | VGQNAGIGFV | KLKDWSKRIT | PETQIGSLIQ | RGMALNMIK |
| acin_baum_NIPH_2061      | MNEKDTVESI | FTVSGFSFTG | VGQNAGIGFV | KLKDWSKRIT | PETQIGSLIQ | RGMALNMIK |
| acin_baum_NIPH_24        | MNEKDTVESI | FTVSGFSFTG | VGQNAGIGFV | KLKDWSKRIT | PETQIGSLIQ | RGMALNMIK |
| acin_baum_NIPH_290       | MNEKDTVESI | FTVSGFSFTG | VGQNAGIGFV | KLKDWSKRIT | PETQIGSLIQ | RGMALNMIK |
| acin_baum_NIPH_329       | MNEKDTVESI | FTVSGFSFTG | VGQNAGIGFV | KLKDWSKRIT | PETQIGSLIQ | RGMALNMIK |
| acin_baum_NIPH_335       | MNEKDTVESI | FTVSGFSFTG | VGQNAGIGFV | KLKDWSKRIT | PETQIGSLIQ | RGMALNMIK |
| acin_baum_NIPH_410       | MNEKDTVESI | FTVSGFSFTG | VGQNAGIGFV | KLKDWSKRIT | PETQIGSLIQ | RGMALNMIK |
| acin_baum_NIPH_527       | MNEKDTVESI | FTVSGFSFTG | VGQNAGIGFV | KLKDWSKRIT | PETQIGSLIQ | RGMALNMIK |
| acin_baum_NIPH_528       | MNEKDTVESI | FTVSGFSFTG | VGQNAGIGFV | KLKDWSKRIT | PETQIGSLIQ | RGMALNMIK |
| acin_baum_NIPH_60        | MNEKDTVESI | FTVSGFSFTG | VGQNAGIGFV | KLKDWSKRIT | PETQIGSLIQ | RGMALNMIK |
| acin_baum_NIPH_601       | MNEKDTVESI | FTVSGFSFTG | VGQNAGIGFV | KLKDWSKRIT | PETQIGSLIQ | RGMALNMIK |
| acin_baum_NIPH_615       | MNEKDTVESI | FTVSGFSFTG | VGQNAGIGFV | KLKDWSKRIT | PETQIGSLIQ | RGMALNMIK |
| acin_baum_NIPH_67        | MNEKDTVESI | FTVSGFSFTG | VGQNAGIGFV | KLKDWSKRIT | PETQIGSLIQ | RGMALNMIK |
| acin_baum_NIPH_70        | MNEKDTVESI | FTVSGFSFTG | VGQNAGIGFV | KLKDWSKRIT | PETQIGSLIQ | RGMALNMIK |
| acin_baum_NIPH_80        | MNEKDTVESI | FTVSGFSFTG | VGQNAGIGFV | KLKDWSKRIT | PETQIGSLIQ | RGMALNMIK |

|                          |            |            |           |            |            |            |
|--------------------------|------------|------------|-----------|------------|------------|------------|
| AdeJ_Pasteur             | DASYVMPLQL | PAMPELGVTA | GFNLQLKSS | GQGHEKLIAA | RNTILGLASQ | DKRLVGVRPN |
| acin_baum_ANC_4097       | DASYVMPLQL | PAMPELGVTA | GFNLQLKSS | GQGHEKLIAA | RNTILGLASQ | DKRLVGVRPN |
| acin_baum_AYE            | DASYVMPLQL | PAMPELGVTA | GFNLQLKSS | GQGHEKLIAA | RNTILGLASQ | DKRLVGVRPN |
| acin_baum_BM4587         | DASYVMPLQL | PAMPELGVTA | GFNLQLKSS | GQGHEKLIAA | RNTILGLASQ | DKRLVGVRPN |
| acin_baum_BM4701         | DASYVMPLQL | PAMPELGVTA | GFNLQLKSS | GQGHEKLIAA | RNTILGLASQ | DKRLVGVRPN |
| acin_baum_BM4702         | DASYVMPLQL | PAMPELGVTA | GFNLQLKSS | GQGHEKLIAA | RNTILGLASQ | DKRLVGVRPN |
| acin_baum_BM4703         | DASYVMPLQL | PAMPELGVTA | GFNLQLKSS | GQGHEKLIAA | RNTILGLASQ | DKRLVGVRPN |
| acin_baum_BM4704         | DASYVMPLQL | PAMPELGVTA | GFNLQLKSS | GQGHEKLIAA | RNTILGLASQ | DKRLVGVRPN |
| acin_baum_BM4705         | DASYVMPLQL | PAMPELGVTA | GFNLQLKSS | GQGHEKLIAA | RNTILGLASQ | DKRLVGVRPN |
| acin_baum_BM4706         | DASYVMPLQL | PAMPELGVTA | GFNLQLKSS | GQGHEKLIAA | RNTILGLASQ | DKRLVGVRPN |
| acin_baum_BM4707         | DASYVMPLQL | PAMPELGVTA | GFNLQLKSS | GQGHEKLIAA | RNTILGLASQ | DKRLVGVRPN |
| acin_baum_BM4708         | DASYVMPLQL | PAMPELGVTA | GFNLQLKSS | GQGHEKLIAA | RNTILGLASQ | DKRLVGVRPN |
| acin_baum_BM4709         | DASYVMPLQL | PAMPELGVTA | GFNLQLKSS | GQGHEKLIAA | RNTILGLASQ | DKRLVGVRPN |
| acin_baum_BM4710         | DASYVMPLQL | PAMPELGVTA | GFNLQLKSS | GQGHEKLIAA | RNTILGLASQ | DKRLVGVRPN |
| acin_baum_BM4711         | DASYVMPLQL | PAMPELGVTA | GFNLQLKSS | GQGHEKLIAA | RNTILGLASQ | DKRLVGVRPN |
| acin_baum_BM4712         | DASYVMPLQL | PAMPELGVTA | GFNLQLKSS | GQGHEKLIAA | RNTILGLASQ | DKRLVGVRPN |
| acin_baum_BM4713         | DASYVMPLQL | PAMPELGVTA | GFNLQLKSS | GQGHEKLIAA | RNTILGLASQ | DKRLVGVRPN |
| acin_baum_BM4714         | DASYVMPLQL | PAMPELGVTA | GFNLQLKSS | GQGHEKLIAA | RNTILGLASQ | DKRLVGVRPN |
| acin_baum_CIP_70_34t     | DASYVMPLQL | PAMPELGVTA | GFNLQLKSS | GQGHEKLIAA | RNTILGLASQ | DKRLVGVRPN |
| acin_baum_MRSN_3405      | DASYVMPLQL | PAMPELGVTA | GFNLQLKSS | GQGHEKLIAA | RNTILGLASQ | DKRLVGVRPN |
| acin_baum_NIPH_1362      | DASYVMPLQL | PAMPELGVTA | GFNLQLKSS | GQGHEKLIAA | RNTILGLASQ | DKRLVGVRPN |
| acin_baum_NIPH_1362_redo | DASYVMPLQL | PAMPELGVTA | GFNLQLKSS | GQGHEKLIAA | RNTILGLASQ | DKRLVGVRPN |
| acin_baum_NIPH_146       | DASYVMPLQL | PAMPELGVTA | GFNLQLKSS | GQGHEKLIAA | RNTILGLASQ | DKRLVGVRPN |
| acin_baum_NIPH_1669      | DASYVMPLQL | PAMPELGVTA | GFNLQLKSS | GQGHEKLIAA | RNTILGLASQ | DKRLVGVRPN |
| acin_baum_NIPH_1734      | DASYVMPLQL | PAMPELGVTA | GFNLQLKSS | GQGHEKLIAA | RNTILGLASQ | DKRLVGVRPN |
| acin_baum_NIPH_190       | DASYVMPLQL | PAMPELGVTA | GFNLQLKSS | GQGHEKLIAA | RNTILGLASQ | DKRLVGVRPN |
| acin_baum_NIPH_201       | DASYVMPLQL | PAMPELGVTA | GFNLQLKSS | GQGHEKLIAA | RNTILGLASQ | DKRLVGVRPN |
| acin_baum_NIPH_2061      | DASYVMPLQL | PAMPELGVTA | GFNLQLKSS | GQGHEKLIAA | RNTILGLASQ | DKRLVGVRPN |
| acin_baum_NIPH_24        | DASYVMPLQL | PAMPELGVTA | GFNLQLKSS | GQGHEKLIAA | RNTILGLASQ | DKRLVGVRPN |
| acin_baum_NIPH_290       | DASYVMPLQL | PAMPELGVTA | GFNLQLKSS | GQGHEKLIAA | RNTILGLASQ | DKRLVGVRPN |
| acin_baum_NIPH_329       | DASYVMPLQL | PAMPELGVTA | GFNLQLKSS | GQGHEKLIAA | RNTILGLASQ | DKRLVGVRPN |
| acin_baum_NIPH_335       | DASYVMPLQL | PAMPELGVTA | GFNLQLKSS | GQGHEKLIAA | RNTILGLASQ | DKRLVGVRPN |
| acin_baum_NIPH_410       | DASYVMPLQL | PAMPELGVTA | GFNLQLKSS | GQGHEKLIAA | RNTILGLASQ | DKRLVGVRPN |
| acin_baum_NIPH_527       | DASYVMPLQL | PAMPELGVTA | GFNLQLKSS | GQGHEKLIAA | RNTILGLASQ | DKRLVGVRPN |
| acin_baum_NIPH_528       | DASYVMPLQL | PAMPELGVTA | GFNLQLKSS | GQGHEKLIAA | RNTILGLASQ | DKRLVGVRPN |
| acin_baum_NIPH_60        | DASYVMPLQL | PAMPELGVTA | GFNLQLKSS | GQGHEKLIAA | RNTILGLASQ | DKRLVGVRPN |
| acin_baum_NIPH_601       | DASYVMPLQL | PAMPELGVTA | GFNLQLKSS | GQGHEKLIAA | RNTILGLASQ | DKRLVGVRPN |
| acin_baum_NIPH_615       | DASYVMPLQL | PAMPELGVTA | GFNLQLKSS | GQGHEKLIAA | RNTILGLASQ | DKRLVGVRPN |
| acin_baum_NIPH_67        | DASYVMPLQL | PAMPELGVTA | GFNLQLKSS | GQGHEKLIAA | RNTILGLASQ | DKRLVGVRPN |
| acin_baum_NIPH_70        | DASYVMPLQL | PAMPELGVTA | GFNLQLKSS | GQGHEKLIAA | RNTILGLASQ | DKRLVGVRPN |
| acin_baum_NIPH_80        | DASYVMPLQL | PAMPELGVTA | GFNLQLKSS | GQGHEKLIAA | RNTILGLASQ | DKRLVGVRPN |



|                          |           |            |            |            |            |            |
|--------------------------|-----------|------------|------------|------------|------------|------------|
| AdeJ_Pasteur             | RMPEDLNKW | YVRNNKGEMV | PFSAFATGEW | TYGSPRLERY | NGVSSVNIQG | TPAPGVSSGD |
| acin_baum_ANC_4097       | RMPEDLNKW | YVRNNKGEMV | PFSAFATGEW | TYGSPRLERY | NGVSSVNIQG | TPAPGVSSGD |
| acin_baum_AYE            | RMPEDLNKW | YVRNNKGEMV | PFSAFATGEW | TYGSPRLERY | NGVSSVNIQG | TPAPGVSSGD |
| acin_baum_BM4587         | RMPEDLNKW | YVRNNKGEMV | PFSAFATGEW | TYGSPRLERY | NGVSSVNIQG | TPAPGVSSGD |
| acin_baum_BM4701         | RMPEDLNKW | YVRNNKGEMV | PFSAFATGEW | TYGSPRLERY | NGVSSVNIQG | TPAPGVSSGD |
| acin_baum_BM4702         | RMPEDLNKW | YVRNNKGEMV | PFSAFATGEW | TYGSPRLERY | NGVSSVNIQG | TPAPGVSSGD |
| acin_baum_BM4703         | RMPEDLNKW | YVRNNKGEMV | PFSAFATGEW | TYGSPRLERY | NGVSSVNIQG | TPAPGVSSGD |
| acin_baum_BM4704         | RMPEDLNKW | YVRNNKGEMV | PFSAFATGEW | TYGSPRLERY | NGVSSVNIQG | TPAPGVSSGD |
| acin_baum_BM4705         | RMPEDLNKW | YVRNNKGEMV | PFSAFATGEW | TYGSPRLERY | NGVSSVNIQG | TPAPGVSSGD |
| acin_baum_BM4706         | RMPEDLNKW | YVRNNKGEMV | PFSAFATGEW | TYGSPRLERY | NGVSSVNIQG | TPAPGVSSGD |
| acin_baum_BM4707         | RMPEDLNKW | YVRNNKGEMV | PFSAFATGEW | TYGSPRLERY | NGVSSVNIQG | TPAPGVSSGD |
| acin_baum_BM4708         | RMPEDLNKW | YVRNNKGEMV | PFSAFATGEW | TYGSPRLERY | NGVSSVNIQG | TPAPGVSSGD |
| acin_baum_BM4709         | RMPEDLNKW | YVRNNKGEMV | PFSAFATGEW | TYGSPRLERY | NGVSSVNIQG | TPAPGVSSGD |
| acin_baum_BM4710         | RMPEDLNKW | YVRNNKGEMV | PFSAFATGEW | TYGSPRLERY | NGVSSVNIQG | TPAPGVSSGD |
| acin_baum_BM4711         | RMPEDLNKW | YVRNNKGEMV | PFSAFATGEW | TYGSPRLERY | NGVSSVNIQG | TPAPGVSSGD |
| acin_baum_BM4712         | RMPEDLNKW | YVRNNKGEMV | PFSAFATGEW | TYGSPRLERY | NGVSSVNIQG | TPAPGVSSGD |
| acin_baum_BM4713         | RMPEDLNKW | YVRNNKGEMV | PFSAFATGEW | TYGSPRLERY | NGVSSVNIQG | TPAPGVSSGD |
| acin_baum_BM4714         | RMPEDLNKW | YVRNNKGEMV | PFSAFATGEW | TYGSPRLERY | NGVSSVNIQG | TPAPGVSSGD |
| acin_baum_CIP_70_34t     | RMPEDLNKW | YVRNNKGEMV | PFSAFATGEW | TYGSPRLERY | NGVSSVNIQG | TPAPGVSSGD |
| acin_baum_MRSN_3405      | RMPEDLNKW | YVRNNKGEMV | PFSAFATGEW | TYGSPRLERY | NGVSSVNIQG | TPAPGVSSGD |
| acin_baum_NIPH_1362      | RMPEDLNKW | YVRNNKGEMV | PFSAFATGEW | TYGSPRLERY | NGVSSVNIQG | TPAPGVSSGD |
| acin_baum_NIPH_1362_redo | RMPEDLNKW | YVRNNKGEMV | PFSAFATGEW | TYGSPRLERY | NGVSSVNIQG | TPAPGVSSGD |
| acin_baum_NIPH_146       | RMPEDLNKW | YVRNNKGEMV | PFSAFATGEW | TYGSPRLERY | NGVSSVNIQG | TPAPGVSSGD |
| acin_baum_NIPH_1669      | RMPEDLNKW | YVRNNKGEMV | PFSAFATGEW | TYGSPRLERY | NGVSSVNIQG | TPAPGVSSGD |
| acin_baum_NIPH_1734      | RMPEDLNKW | YVRNNKGEMV | PFSAFATGEW | TYGSPRLERY | NGVSSVNIQG | TPAPGVSSGD |
| acin_baum_NIPH_190       | RMPEDLNKW | YVRNNKGEMV | PFSAFATGEW | TYGSPRLERY | NGVSSVNIQG | TPAPGVSSGD |
| acin_baum_NIPH_201       | RMPEDLNKW | YVRNNKGEMV | PFSAFATGEW | TYGSPRLERY | NGVSSVNIQG | TPAPGVSSGD |
| acin_baum_NIPH_2061      | RMPEDLNKW | YVRNNKGEMV | PFSAFATGEW | TYGSPRLERY | NGVSSVNIQG | TPAPGVSSGD |
| acin_baum_NIPH_24        | RMPEDLNKW | YVRNNKGEMV | PFSAFATGEW | TYGSPRLERY | NGVSSVNIQG | TPAPGVSSGD |
| acin_baum_NIPH_290       | RMPEDLNKW | YVRNNKGEMV | PFSAFATGEW | TYGSPRLERY | NGVSSVNIQG | TPAPGVSSGD |
| acin_baum_NIPH_329       | RMPEDLNKW | YVRNNKGEMV | PFSAFATGEW | TYGSPRLERY | NGVSSVNIQG | TPAPGVSSGD |
| acin_baum_NIPH_335       | RMPEDLNKW | YVRNNKGEMV | PFSAFATGEW | TYGSPRLERY | NGVSSVNIQG | TPAPGVSSGD |
| acin_baum_NIPH_410       | RMPEDLNKW | YVRNNKGEMV | PFSAFATGEW | TYGSPRLERY | NGVSSVNIQG | TPAPGVSSGD |
| acin_baum_NIPH_527       | RMPEDLNKW | YVRNNKGEMV | PFSAFATGEW | TYGSPRLERY | NGVSSVNIQG | TPAPGVSSGD |
| acin_baum_NIPH_528       | RMPEDLNKW | YVRNNKGEMV | PFSAFATGEW | TYGSPRLERY | NGVSSVNIQG | TPAPGVSSGD |
| acin_baum_NIPH_60        | RMPEDLNKW | YVRNNKGEMV | PFSAFATGEW | TYGSPRLERY | NGVSSVNIQG | TPAPGVSSGD |
| acin_baum_NIPH_601       | RMPEDLNKW | YVRNNKGEMV | PFSAFATGEW | TYGSPRLERY | NGVSSVNIQG | TPAPGVSSGD |
| acin_baum_NIPH_615       | RMPEDLNKW | YVRNNKGEMV | PFSAFATGEW | TYGSPRLERY | NGVSSVNIQG | TPAPGVSSGD |
| acin_baum_NIPH_67        | RMPEDLNKW | YVRNNKGEMV | PFSAFATGEW | TYGSPRLERY | NGVSSVNIQG | TPAPGVSSGD |
| acin_baum_NIPH_70        | RMPEDLNKW | YVRNNKGEMV | PFSAFATGEW | TYGSPRLERY | NGVSSVNIQG | TPAPGVSSGD |
| acin_baum_NIPH_80        | RMPEDLNKW | YVRNNKGEMV | PFSAFATGEW | TYGSPRLERY | NGVSSVNIQG | TPAPGVSSGD |







|                          |            |            |           |            |            |            |
|--------------------------|------------|------------|-----------|------------|------------|------------|
| AdeJ_Pasteur             | SIPFSVLLVV | PLGVIGAIVL | TYLGMIKGD | PNLSNNIYFQ | VAIIAVIGLS | AKNAILIVEF |
| acin_baum_ANC_4097       | SIPFSVLLVV | PLGVIGAIVL | TYLGMIKGD | PNLSNNIYFQ | VAIIAVIGLS | AKNAILIVEF |
| acin_baum_AYE            | SIPFSVLLVV | PLGVIGAIVL | TYLGMIKGD | PNLSNNIYFQ | VAIIAVIGLS | AKNAILIVEF |
| acin_baum_BM4587         | SIPFSVLLVV | PLGVIGAIVL | TYLGMIKGD | PNLSNNIYFQ | VAIIAVIGLS | AKNAILIVEF |
| acin_baum_BM4701         | SIPFSVLLVV | PLGVIGAIVL | TYLGMIKGD | PNLSNNIYFQ | VAIIAVIGLS | AKNAILIVEF |
| acin_baum_BM4702         | SIPFSVLLVV | PLGVIGAIVL | TYLGMIKGD | PNLSNNIYFQ | VAIIAVIGLS | AKNAILIVEF |
| acin_baum_BM4703         | SIPFSVLLVV | PLGVIGAIVL | TYLGMIKGD | PNLSNNIYFQ | VAIIAVIGLS | AKNAILIVEF |
| acin_baum_BM4704         | SIPFSVLLVV | PLGVIGAIVL | TYLGMIKGD | PNLSNNIYFQ | VAIIAVIGLS | AKNAILIVEF |
| acin_baum_BM4705         | SIPFSVLLVV | PLGVIGAIVL | TYLGMIKGD | PNLSNNIYFQ | VAIIAVIGLS | AKNAILIVEF |
| acin_baum_BM4706         | SIPFSVLLVV | PLGVIGAIVL | TYLGMIKGD | PNLSNNIYFQ | VAIIAVIGLS | AKNAILIVEF |
| acin_baum_BM4707         | SIPFSVLLVV | PLGVIGAIVL | TYLGMIKGD | PNLSNNIYFQ | VAIIAVIGLS | AKNAILIVEF |
| acin_baum_BM4708         | SIPFSVLLVV | PLGVIGAIVL | TYLGMIKGD | PNLSNNIYFQ | VAIIAVIGLS | AKNAILIVEF |
| acin_baum_BM4709         | SIPFSVLLVV | PLGVIGAIVL | TYLGMIKGD | PNLSNNIYFQ | VAIIAVIGLS | AKNAILIVEF |
| acin_baum_BM4710         | SIPFSVLLVV | PLGVIGAIVL | TYLGMIKGD | PNLSNNIYFQ | VAIIAVIGLS | AKNAILIVEF |
| acin_baum_BM4711         | SIPFSVLLVV | PLGVIGAIVL | TYLGMIKGD | PNLSNNIYFQ | VAIIAVIGLS | AKNAILIVEF |
| acin_baum_BM4712         | SIPFSVLLVV | PLGVIGAIVL | TYLGMIKGD | PNLSNNIYFQ | VAIIAVIGLS | AKNAILIVEF |
| acin_baum_BM4713         | SIPFSVLLVV | PLGVIGAIVL | TYLGMIKGD | PNLSNNIYFQ | VAIIAVIGLS | AKNAILIVEF |
| acin_baum_BM4714         | SIPFSVLLVV | PLGVIGAIVL | TYLGMIKGD | PNLSNNIYFQ | VAIIAVIGLS | AKNAILIVEF |
| acin_baum_CIP_70_34t     | SIPFSVLLVV | PLGVIGAIVL | TYLGMIKGD | PNLSNNIYFQ | VAIIAVIGLS | AKNAILIVEF |
| acin_baum_MRSN_3405      | SIPFSVLLVV | PLGVIGAIVL | TYLGMIKGD | PNLSNNIYFQ | VAIIAVIGLS | AKNAILIVEF |
| acin_baum_NIPH_1362      | SIPFSVLLVV | PLGVIGAIVL | TYLGMIKGD | PNLSNNIYFQ | VAIIAVIGLS | AKNAILIVEF |
| acin_baum_NIPH_1362_redo | SIPFSVLLVV | PLGVIGAIVL | TYLGMIKGD | PNLSNNIYFQ | VAIIAVIGLS | AKNAILIVEF |
| acin_baum_NIPH_146       | SIPFSVLLVV | PLGVIGAIVL | TYLGMIKGD | PNLSNNIYFQ | VAIIAVIGLS | AKNAILIVEF |
| acin_baum_NIPH_1669      | SIPFSVLLVV | PLGVIGAIVL | TYLGMIKGD | PNLSNNIYFQ | VAIIAVIGLS | AKNAILIVEF |
| acin_baum_NIPH_1734      | SIPFSVLLVV | PLGVIGAIVL | TYLGMIKGD | PNLSNNIYFQ | VAIIAVIGLS | AKNAILIVEF |
| acin_baum_NIPH_190       | SIPFSVLLVV | PLGVIGAIVL | TYLGMIKGD | PNLSNNIYFQ | VAIIAVIGLS | AKNAILIVEF |
| acin_baum_NIPH_201       | SIPFSVLLVV | PLGVIGAIVL | TYLGMIKGD | PNLSNNIYFQ | VAIIAVIGLS | AKNAILIVEF |
| acin_baum_NIPH_2061      | SIPFSVLLVV | PLGVIGAIVL | TYLGMIKGD | PNLSNNIYFQ | VAIIAVIGLS | AKNAILIVEF |
| acin_baum_NIPH_24        | SIPFSVLLVV | PLGVIGAIVL | TYLGMIKGD | PNLSNNIYFQ | VAIIAVIGLS | AKNAILIVEF |
| acin_baum_NIPH_290       | SIPFSVLLVV | PLGVIGAIVL | TYLGMIKGD | PNLSNNIYFQ | VAIIAVIGLS | AKNAILIVEF |
| acin_baum_NIPH_329       | SIPFSVLLVV | PLGVIGAIVL | TYLGMIKGD | PNLSNNIYFQ | VAIIAVIGLS | AKNAILIVEF |
| acin_baum_NIPH_335       | SIPFSVLLVV | PLGVIGAIVL | TYLGMIKGD | PNLSNNIYFQ | VAIIAVIGLS | AKNAILIVEF |
| acin_baum_NIPH_410       | SIPFSVLLVV | PLGVIGAIVL | TYLGMIKGD | PNLSNNIYFQ | VAIIAVIGLS | AKNAILIVEF |
| acin_baum_NIPH_527       | SIPFSVLLVV | PLGVIGAIVL | TYLGMIKGD | PNLSNNIYFQ | VAIIAVIGLS | AKNAILIVEF |
| acin_baum_NIPH_528       | SIPFSVLLVV | PLGVIGAIVL | TYLGMIKGD | PNLSNNIYFQ | VAIIAVIGLS | AKNAILIVEF |
| acin_baum_NIPH_60        | SIPFSVLLVV | PLGVIGAIVL | TYLGMIKGD | PNLSNNIYFQ | VAIIAVIGLS | AKNAILIVEF |
| acin_baum_NIPH_601       | SIPFSVLLVV | PLGVIGAIVL | TYLGMIKGD | PNLSNNIYFQ | VAIIAVIGLS | AKNAILIVEF |
| acin_baum_NIPH_615       | SIPFSVLLVV | PLGVIGAIVL | TYLGMIKGD | PNLSNNIYFQ | VAIIAVIGLS | AKNAILIVEF |
| acin_baum_NIPH_67        | SIPFSVLLVV | PLGVIGAIVL | TYLGMIKGD | PNLSNNIYFQ | VAIIAVIGLS | AKNAILIVEF |
| acin_baum_NIPH_70        | SIPFSVLLVV | PLGVIGAIVL | TYLGMIKGD | PNLSNNIYFQ | VAIIAVIGLS | AKNAILIVEF |
| acin_baum_NIPH_80        | SIPFSVLLVV | PLGVIGAIVL | TYLGMIKGD | PNLSNNIYFQ | VAIIAVIGLS | AKNAILIVEF |



|                          |            |            |            |          |
|--------------------------|------------|------------|------------|----------|
| AdeJ_Pasteur             | GVLSATFLGI | FFIPVFYVWI | RSIFKYKPKT | INTQEHKS |
| acin_baum_ANC_4097       | GVLSATFLGI | FFIPVFYVWI | RSIFKYKPKT | INTQEHKS |
| acin_baum_AYE            | GVLSATFLGI | FFIPVFYVWI | RSIFKYKPKT | INTQEHKS |
| acin_baum_BM4587         | GVLSATFLGI | FFIPVFYVWI | RSIFKYKPKT | INTQEHKS |
| acin_baum_BM4701         | GVLSATFLGI | FFIPVFYVWI | RSIFKYKPKT | INTQEHKS |
| acin_baum_BM4702         | GVLSATFLGI | FFIPVFYVWI | RSIFKYKPKT | INTQEHKS |
| acin_baum_BM4703         | GVLSATFLGI | FFIPVFYVWI | RSIFKYKPKT | INTQEHKS |
| acin_baum_BM4704         | GVLSATFLGI | FFIPVFYVWI | RSIFKYKPKT | INTQEHKS |
| acin_baum_BM4705         | GVLSATFLGI | FFIPVFYVWI | RSIFKYKPKT | INTQEHKS |
| acin_baum_BM4706         | GVLSATFLGI | FFIPVFYVWI | RSIFKYKPKT | INTQEHKS |
| acin_baum_BM4707         | GVLSATFLGI | FFIPVFYVWI | RSIFKYKPKT | INTQEHKS |
| acin_baum_BM4708         | GVLSATFLGI | FFIPVFYVWI | RSIFKYKPKT | INTQEHKS |
| acin_baum_BM4709         | GVLSATFLGI | FFIPVFYVWI | RSIFKYKPKT | INTQEHKS |
| acin_baum_BM4710         | GVLSATFLGI | FFIPVFYVWI | RSIFKYKPKT | INTQEHKS |
| acin_baum_BM4711         | GVLSATFLGI | FFIPVFYVWI | RSIFKYKPKT | INTQEHKS |
| acin_baum_BM4712         | GVLSATFLGI | FFIPVFYVWI | RSIFKYKPKT | INTQEHKS |
| acin_baum_BM4713         | GVLSATFLGI | FFIPVFYVWI | RSIFKYKPKT | INTQEHKS |
| acin_baum_BM4714         | GVLSATFLGI | FFIPVFYVWI | RSIFKYKPKT | INTQEHKS |
| acin_baum_CIP_70_34t     | GVLSATFLGI | FFIPVFYVWI | RSIFKYKPKT | INTQEHKS |
| acin_baum_MRSN_3405      | GVLSATFLGI | FFIPVFYVWI | RSIFKYKPKT | INTQEHKS |
| acin_baum_NIPH_1362      | GVLSATFLGI | FFIPVFYVWI | RSIFKYKPKT | INTQEHKS |
| acin_baum_NIPH_1362_redo | GVLSATFLGI | FFIPVFYVWI | RSIFKYKPKT | INTQEHKS |
| acin_baum_NIPH_146       | GVLSATFLGI | FFIPVFYVWI | RSIFKYKPKT | INTQEHKS |
| acin_baum_NIPH_1669      | GVLSATFLGI | FFIPVFYVWI | RSIFKYKPKT | INTQEHKS |
| acin_baum_NIPH_1734      | GVLSATFLGI | FFIPVFYVWI | RSIFKYKPKT | INTQEHKS |
| acin_baum_NIPH_190       | GVLSATFLGI | FFIPVFYVWI | RSIFKYKPKT | INTQEHKS |
| acin_baum_NIPH_201       | GVLSATFLGI | FFIPVFYVWI | RSIFKYKPKT | INTQEHKS |
| acin_baum_NIPH_2061      | GVLSATFLGI | FFIPVFYVWI | RSIFKYKPKT | INTQEHKS |
| acin_baum_NIPH_24        | GVLSATFLGI | FFIPVFYVWI | RSIFKYKPKT | INTQEHKS |
| acin_baum_NIPH_290       | GVLSATFLGI | FFIPVFYVWI | RSIFKYKPKT | INTQEHKS |
| acin_baum_NIPH_329       | GVLSATFLGI | FFIPVFYVWI | RSIFKYKPKT | INTQEHKS |
| acin_baum_NIPH_335       | GVLSATFLGI | FFIPVFYVWI | RSIFKYKPKT | INTQEHKS |
| acin_baum_NIPH_410       | GVLSATFLGI | FFIPVFYVWI | RSIFKYKPKT | INTQEHKS |
| acin_baum_NIPH_527       | GVLSATFLGI | FFIPVFYVWI | RSIFKYKPKT | INTQEHKS |
| acin_baum_NIPH_528       | GVLSATFLGI | FFIPVFYVWI | RSIFKYKPKT | INTQEHKS |
| acin_baum_NIPH_60        | GVLSATFLGI | FFIPVFYVWI | RSIFKYKPKT | INTQEHKS |
| acin_baum_NIPH_601       | GVLSATFLGI | FFIPVFYVWI | RSIFKYKPKT | INTQEHKS |
| acin_baum_NIPH_615       | GVLSATFLGI | FFIPVFYVWI | RSIFKYKPKT | INTQEHKS |
| acin_baum_NIPH_67        | GVLSATFLGI | FFIPVFYVWI | RSIFKYKPKT | INTQEHKS |
| acin_baum_NIPH_70        | GVLSATFLGI | FFIPVFYVWI | RSIFKYKPKT | INTQEHKS |
| acin_baum_NIPH_80        | GVLSATFLGI | FFIPVFYVWI | RSIFKYKPKT | INTQEHKS |
