# Supplementary material
Source: PubMed Central journal article supplement (PMC5836370)
Supplement: supp_RA117.000107_4677_1_supp_3200_tsxtgs.pdf [file supp_RA117.000107_4677_1_supp_3200_tsxtgs.pdf]

1

|                            |            |            |            |            |            |
|----------------------------|------------|------------|------------|------------|------------|
| tr T2C8L3 T2C8L3_ACIBA     | MHDPVLESHH | LVCEKPQTRR | GIERRALLL  | SATELFLEKG | YDAVSLDDIV |
| acin_baum_ANC_4097         | MHDPVLESHH | LVCEKPQTRR | GIERRALLL  | SATELFLEKG | YDAVSLDDIV |
| acin_baum_AYE              | MHDPVLESHH | LVCEKPQTRR | GIERRALLL  | SATELFLEKG | YDAVSLDDIV |
| acin_baum_BM4587           | MHDPVLESHH | LVCEKPQTRR | GIERRALLL  | SATELFLEKG | YDAVSLDDIV |
| acin_baum_BM4701           | MHDPVLESHH | LVCEKPQTRR | GIERRALLL  | SATELFLEKG | YDAVSLDDIV |
| acin_baum_BM4702           | MHDPVLESHH | LVCEKPQTRR | GIERRALLL  | SATELFLEKG | YDAVSLDDIV |
| acin_baum_BM4703           | MHDPVLESHH | LVCEKPQTRR | GIERRALLL  | SATELFLEKG | YDAVSLDDIV |
| acin_baum_BM4704           | MHDPVLESHH | LVCEKPQTRR | GIERRALLL  | SATELFLEKG | YDAVSLDDIV |
| acin_baum_BM4705           | MHDPVLESYP | PICDKPQTRR | GVERRLALLL | SATELFLEKG | YDAVSLDDIV |
| acin_baum_BM4706           | MHDPVLESHH | LVCEKPQTRR | GIERRALLL  | SATELFLEKG | YDAVSLDDIV |
| acin_baum_BM4707           | MHDPVLESHH | LVCEKLQTRR | GIERRALLL  | SATELFLEKG | YDAVSLDDIV |
| acin_baum_BM4708           | MHDPVLESHH | LVCEKPQTRR | GIERRALLL  | SATELFLEKG | YDAVSLDDIV |
| acin_baum_BM4709           | MHDPVLESHH | LVCEKPQTRR | GIERRALLL  | SATELFLEKG | YDAVSLDDIV |
| acin_baum_BM4710           | MHDPVLESHH | LVCEKPQTRR | GIERRALLL  | SATELFLEKG | YDAVSLDDIV |
| acin_baum_BM4711           | MHDPVLESHH | LVCEKPQTRR | GIERRALLL  | SATELFLEKG | YDAVSLDDIV |
| acin_baum_BM4712           | MHDPVLESHH | LVCEKPQTRR | GIERRALLL  | SATELFLEKG | YDAVSLDDIV |
| acin_baum_BM4713           | MHDPVLESHH | LVCEKPQTRR | GIERRALLL  | SATELFLEKG | YDAVSLDDIV |
| acin_baum_BM4714           | MHDPVLESHH | LVCEKPQTRR | GIERRALLL  | SATELFLEKG | YDAVSLDDIV |
| acin_baum_CIP_70_34t       | MHDPVLESHH | LVCEKPQTRR | GIERRALLL  | SATELFLEKG | YDAVSLDDIV |
| acin_baum_MRSN_3405        | -----      | -----      | -----      | -----KG    | YDAVSLDDIV |
| acin_baum_NIPH_146         | MHDPVLESHH | LVCEKPQTRR | GIERRALLL  | SATELFLEKG | YDAVSLDDIV |
| acin_baum_NIPH_1669        | MHDPVLESHH | LVCEKPQTRR | GIERRALLL  | SATELFLEKG | YDAVSLDDIV |
| acin_baum_NIPH_1734        | MHDPVLESHH | LVCEKPQTRR | GIERRALLL  | SATELFLEKG | YDAVSLDDIV |
| acin_baum_NIPH_190         | MHDPVLESHH | LVCEKPQTRR | GIERRALLL  | SATELFLEKG | YDAVSLDDIV |
| acin_baum_NIPH_201         | MHDPVLESHH | LVCEKPQTRR | GIERRALLL  | SATELFLEKG | YDAVSLDDIV |
| acin_baum_NIPH_1362        | MHDPVLESHH | LVCEKPQTRR | GIERRALLL  | SATELFLEKG | YDAVSLDDIV |
| acin_baum_NIPH_1362.1      | -----      | -----      | -----      | -----      | -----      |
| acin_baum_NIPH_1362_redo   | MHDPVLESHH | LVCEKPQTRR | GIERRALLL  | SATELFLEKG | YDAVSLDDIV |
| acin_baum_NIPH_1362_redo.1 | -----      | -----      | -----      | -----      | -----      |
| acin_baum_NIPH_2061        | MHDPVLESHH | LVCEKPQTRR | GIERRALLL  | SATELFLEKG | YDAVSLDDIV |
| acin_baum_NIPH_24          | MHDPVLESHH | LVCEKPQTRR | GIERRALLL  | SATELFLEKG | YDAVSLDDIV |
| acin_baum_NIPH_290         | MHDPVLESHH | LVCEKPQTRR | GIERRALLL  | SATELFLEKG | YDAVSLDDIV |
| acin_baum_NIPH_329         | MHDPVLESHH | LVCEKPQTRR | GIERRALLL  | SATELFLEKG | YDAVSLDDIV |
| acin_baum_NIPH_335         | MHDPVLESHH | LVCEKPQTRR | GIERRALLL  | SATELFLEKG | YDAVSLDDIV |
| acin_baum_NIPH_410         | MHDPVLESHH | LVCEKPQTRR | GIERRALLL  | SATELFLEKG | YDAVSLDDIV |
| acin_baum_NIPH_527         | MHDPVLESHH | LVCEKPQTRR | GIERRALLL  | SATELFLEKG | YDAVSLDDIV |
| acin_baum_NIPH_528         | MHDPVLESHH | LVCEKPQTRR | GIERRALLL  | SATELFLEKG | YDAVSLDDIV |
| acin_baum_NIPH_60          | MHDPVLESHH | LVCEKPQTRR | GIERRALLL  | SATELFLEKG | YDAVSLDDIV |
| acin_baum_NIPH_601         | MHDPVLESHH | LVCEKPQTRR | GIERRALLL  | SATELFLEKG | YDAVSLDDIV |
| acin_baum_NIPH_615         | MHDPVLESHH | LVCEKPQTRR | GIERRALLL  | SATELFLEKG | YDAVSLDDIV |
| acin_baum_NIPH_67          | MHDPVLESHH | LVCEKPQTRR | GIERRALLL  | SATELFLEKG | YDAVSLDDIV |
| acin_baum_NIPH_70          | MHDPVLESHH | LVCEKPQTRR | GIERRALLL  | SATELFLEKG | YDAVSLDDIV |
| acin_baum_NIPH_80          | MHDPVLESHH | LVCEKPQTRR | GIERRALLL  | SATELFLEKG | YDAVSLDDIV |

|                            |            |            |             |            |            |
|----------------------------|------------|------------|-------------|------------|------------|
| tr T2C8L3 T2C8L3_ACIBA     | NHAGGSKTSI | YKYFGNKDGL | FTAI CDYRRE | MFFKDICIAF | QPEQTSLKDY |
| acin_baum_ANC_4097         | NHAGGSKTSI | YKYFGNKDGL | FTAI CDYRRE | MFFKDICIAF | QPEQTSLKDY |
| acin_baum_AYE              | NHAGGSKTSI | YKYFGNKDGL | FTAI CDYRRE | MFFKDICIAF | QPEQTSLKDY |
| acin_baum_BM4587           | NHAGGSKTSI | YKYFGNKDGL | FTAI CDYRRE | MFFKDICIAF | QPEQTSLKDY |
| acin_baum_BM4701           | NHAGGSKTSI | YKYFGNKDGL | FTAI CDYRRE | MFFKDICIAF | QPERTSLKDY |
| acin_baum_BM4702           | NHAGGSKTSI | YKYFGNKDGL | FTAI CDYRRE | MFFKDICIAF | QPERTSLKDY |
| acin_baum_BM4703           | NHAGGSKTSI | YKYFGNKDGL | FTAI CDYRRE | MFFKDICIAF | QPEQTSLKDY |
| acin_baum_BM4704           | NHAGGSKTSI | YKYFGNKDGL | FTAI CDYRRE | MFFKDICIAF | QPEQTSLKDY |
| acin_baum_BM4705           | NHAGGSKASI | YKYFGNKEGL | FTAI CDYRRE | MFFKDICIAF | QPDQASLKEY |
| acin_baum_BM4706           | NHAGGSKTSI | YKYFGNKDDL | FTAI CDYRRE | MFFKDICIAF | QPERTSLKDY |
| acin_baum_BM4707           | NHAGGSKTSI | YKYFGNKDGL | FTAI CDYRRE | MFFKDICIAF | QPEQTSLKDY |
| acin_baum_BM4708           | NHAGGSKTSI | YKYFGNKDGL | FTAI CDYRRE | MFFKDICIAF | QPEQTSLKDY |
| acin_baum_BM4709           | NHAGGSKTSI | YKYFGNKDGL | FTAI CDYRRE | MFFKDICIAF | QPEQTSLKDY |
| acin_baum_BM4710           | NHAGGSKTSI | YKYFGNKDGL | FTAI CDYRRE | MFFKDICIAF | QPEQTSLKDY |
| acin_baum_BM4711           | NHAGGSKTSI | YKYFGNKDGL | FTAI CDYRRE | MFFKDICIAF | QPEQTSLKDY |
| acin_baum_BM4712           | NHAGGSKTSI | YKYFGNKDGL | FTAI CDYRRE | MFFKDICIAF | QPEQTSLKDY |
| acin_baum_BM4713           | NHAGGSKTSI | YKYFGNKDGL | FTAI CDYRRE | MFFKDICIAF | QPEQTSLKDY |
| acin_baum_BM4714           | NHAGGSKTSI | YKYFGNKDGL | FTAI CDYRRE | MFFKDICIAF | QPEQTSLKDY |
| acin_baum_CIP_70_34t       | NHAGGSKTSI | YKYFGNKDGL | FTAI CDYRRE | MFFKDICIAF | QPEQTSLKDY |
| acin_baum_MRSN_3405        | NHAGGSKTSI | YKYFGNKDGL | FTAI CDYRRE | MFFKDICIAF | QPEQTSLKDY |
| acin_baum_NIPH_146         | NHAGGSKTSI | YKYFGNKDGL | FTAI CDYRRE | MFFKDICIAF | QPEQTSLKDY |
| acin_baum_NIPH_1669        | NHAGGSKTSI | YKYFGNKDGL | FTAI CDYRRE | MFFKDICIAF | QPEQTSLKDY |
| acin_baum_NIPH_1734        | NHAGGSKTSI | YKYFGNKDGL | FTAI CDYRRE | MFFKDICIAF | QPEQTSLKDY |
| acin_baum_NIPH_190         | NHAGGSKTSI | YKYFGNKDGL | FTAI CDYRRE | IFFKDICIAF | QPEQTSLKDY |
| acin_baum_NIPH_201         | NHAGGSKTSI | YKYFGNKDGL | FTAI CDYRRE | MFFKDICIAF | QPEQSSLKDY |
| acin_baum_NIPH_1362        | NHAGGSKTSI | YKYFGNKDGL | FTAI CDYRRE | MFFKDICIAF | QPEQTSLKDY |
| acin_baum_NIPH_1362.1      | -----      | -----      | ----CNF---- | -----      | -----      |
| acin_baum_NIPH_1362_redo   | NHAGGSKTSI | YKYFGNKDGL | FTAI CDYRRE | MFFKDICIAF | QPEQTSLKDY |
| acin_baum_NIPH_1362_redo.1 | -----      | -----      | ----CNF---- | -----      | -----      |
| acin_baum_NIPH_2061        | NHAGGSKTSI | YKYFGNKDGL | FTAI CDYRRE | MFFKDICIAF | QPEQTSLKDY |
| acin_baum_NIPH_24          | NHAGGSKTSI | YKYFGNKDGL | FTAI CDYRRE | MFFKDICIAF | QPEQTSLKDY |
| acin_baum_NIPH_290         | NHAGGSKTSI | YKYFGNKDGL | FTAI CDYRRE | MFFKDICIAF | QPEQTSLKDY |
| acin_baum_NIPH_329         | NHAGGSKTSI | YKYFGNKDGL | FTAI CDYRRE | MFFKDICIAF | QPERTSLKDY |
| acin_baum_NIPH_335         | NHAGGSKTSI | YKYFGNKDGL | FTAI CDYRRE | MFFKDICIAF | QPEQTSLKDY |
| acin_baum_NIPH_410         | NHAGGSKTSI | YKYFGNKDGL | FTAI CDYRRE | MFFKDICIAF | QPEQTSLKDY |
| acin_baum_NIPH_527         | NHAGGSKTSI | YKYFGNKDGL | FTAI CDYRRE | MFFKDICIAF | QPEQTSLKDY |
| acin_baum_NIPH_528         | NHAGGSKTSI | YKYFGNKDGL | FTAI CDYRRE | MFFKDICIAF | QPEQTSLKDY |
| acin_baum_NIPH_60          | NHAGGSKTSI | YKYFGNKDGL | FTAI CDYRRE | MFFKDICIAF | QPEQTSLKDY |
| acin_baum_NIPH_601         | NHAGGSKTSI | YKYFGNKDGL | FTAI CDYRRE | MFFKDICIAF | QPEQTSLKDY |
| acin_baum_NIPH_615         | NHAGGSKTSI | YKYFGNKDGL | FTAI CDYRRE | MFFKDICIAF | QPERTSLKDY |
| acin_baum_NIPH_67          | NHAGGSKTSI | YKYFGNKDGL | FTAI CDYRRE | MFFKDICIAF | QPEQTSLKDY |
| acin_baum_NIPH_70          | NHAGGSKTSI | YKYFGNKDGL | FTAI CDYRRE | MFFKDICIAF | QPEQTSLKDY |
| acin_baum_NIPH_80          | NHAGGSKTSI | YKYFGNKDGL | FTAI CDYRRE | MFFKDICIAF | QPEQTSLKDY |

|                            |             |            |            |            |            |
|----------------------------|-------------|------------|------------|------------|------------|
| tr T2C8L3 T2C8L3_ACIBA     | LIQTLIRFYK  | PFIQPEHIAF | LRLVIEQTQC | NATLSQYLYE | KCALDVQNTI |
| acin_baum_ANC_4097         | LIQTLIRFYK  | HIIQPEHIAF | LRLVIEQTQC | NATLSQYLYE | KCALDVQNTI |
| acin_baum_AYE              | LIQTLIRFYK  | HIIQPEHIAF | LRLVIEQTQC | NATLSQYLYE | KCALDVQNTI |
| acin_baum_BM4587           | LIQTLIRFYK  | HIIQPEHIAF | LRLVIEQTQC | NATLSQYLYE | KCALDVQNTI |
| acin_baum_BM4701           | LIHTLIRFYK  | HIIQPEHIAF | LRLVIEQTQC | NATLSQYLYE | KCALDVQNTI |
| acin_baum_BM4702           | LIHTLIRFYK  | HIIQPEHIAF | LRLVIEQTQC | NATLSQYLYE | KCALDVQNTI |
| acin_baum_BM4703           | LIQTLIRFYK  | HIIQPEHIAF | LRLVIEQTQC | NATLSQYLYE | KCALDVQNTI |
| acin_baum_BM4704           | *LIQTLIRFYK | HIIQPEHIAF | LRLVIEQTQC | NATLSQYLYE | KCALDVQNTI |
| acin_baum_BM4705           | LIQTLIRFYK  | HIIQPEHIAF | LRLVIEQTQC | NATLSQYLYE | KCALDVQNTI |
| acin_baum_BM4706           | LIHTLIRFYK  | HIIQPEHIAF | LRLVIEQTQC | NATLSQYLYE | KCALDVQNTI |
| acin_baum_BM4707           | LIQTLIRFYK  | HIIQPEHIAF | LRLVIEQTQC | NATLSQYLYE | KCALDVQNTI |
| acin_baum_BM4708           | LIQTLIRFYK  | HIIQPEHIAF | LRLVIEQTQC | NATLSQYLYE | KCALDVQNTI |
| acin_baum_BM4709           | LIQTLIRFYK  | HIIQPEHIAF | LRLVIEQTQC | NATLSQYLYE | KCALDVQNTI |
| acin_baum_BM4710           | LIQTLIRFYK  | HIIQPEHIAF | LRLVIEQTQC | NATLSQYLYE | KCALDVQNTI |
| acin_baum_BM4711           | LIQTLIRFYK  | HIIQPEHIAF | LRLVIEQTQC | NATLSQYLYE | KCALDVQNTI |
| acin_baum_BM4712           | LIQTLIRFYK  | HIIQPEHIAF | LRLVIEQTQC | NATLSQYLYE | KCALDVQNTI |
| acin_baum_BM4713           | LIQTLIRFYK  | HIIQPEHIAF | LRLVIEQTQC | NATLSQYLYE | KCALDVQNTI |
| acin_baum_BM4714           | LIQTLIRFYK  | HIIQPEHIAF | LRLVIEQTQC | NATLSQYLYE | KCALDVQNTI |
| acin_baum_CIP_70_34t       | LIQTLIRFYK  | HIIQPEHIAF | LRLVIEQTQC | NATLSQYLYE | KCALDVQNTI |
| acin_baum_MRSN_3405        | LIQTLIRFYK  | HIIQPEHIAF | LRLVIEQTQC | NATLSQYLYE | KCALDVQNTI |
| acin_baum_NIPH_146         | LIQTLIRFYK  | HIIQPEHIAF | LRLVIEQTQC | NATLSQYLYE | KCALDVQNTI |
| acin_baum_NIPH_1669        | LIQTLIRFYK  | HIIQPEHIAF | LRLVIEQTQC | NATLSQYLYE | KCALDVQNTI |
| acin_baum_NIPH_1734        | LIQTLIRFYK  | HIIQPEHIAF | LRLVIEQTQC | NATLSQYLYE | KCALDVQNTI |
| acin_baum_NIPH_190         | LIQTLIRFYK  | HIIQPEHIAF | LRLVIEQTQC | NATLSQYLYE | KCALDVQNTI |
| acin_baum_NIPH_201         | LIQTLIRFYK  | HIIQPEHIAF | LRLVIEQTQC | NATLSQYLYE | KCALDVQNTI |
| acin_baum_NIPH_1362        | LIQTLIRFYK  | HIIQPEHIAF | LRLVIEQTQC | NATLS----- | -----      |
| acin_baum_NIPH_1362.1      | -----       | -----      | -----      | EQYLYE     | KCALDVQNTI |
| acin_baum_NIPH_1362_redo   | LIQTLIRFYK  | HIIQPEHIAF | LRLVIEQTQC | NATLS----- | -----      |
| acin_baum_NIPH_1362_redo.1 | -----       | -----      | -----      | EQYLYE     | KCALDVQNTI |
| acin_baum_NIPH_2061        | LIQTLIRFYK  | HIIQPEHIAF | LRLVIEQTQC | NATLSQYLYE | KCALDVQNTI |
| acin_baum_NIPH_24          | LIQTLIRFYK  | HIIQPEHIAF | LRLVIEQTQC | NATLSQYLYE | KCALDVQNTI |
| acin_baum_NIPH_290         | LIQTLIRFYK  | HIIQPEHIAF | LRLVIEQTQC | NATLSQYLYE | KCALDVQNTI |
| acin_baum_NIPH_329         | LIHTLIRFYK  | HIIQPEHIAF | LRLVIEQTQC | NATLSQYLYE | KCALDVQNTI |
| acin_baum_NIPH_335         | LIQTLIRFYK  | HIIQPEHIAF | LRLVIEQTQC | NATLSQYLYE | KCALDVQNTI |
| acin_baum_NIPH_410         | LIQTLIRFYK  | HIIQPEHIAF | LRLVIEQTQC | NATLSQYLYE | KCALDVQNTI |
| acin_baum_NIPH_527         | LIQTLIRFYK  | HIIQPEHIAF | LRLVIEQTQC | NATLSQYLYE | KCALDVQNTI |
| acin_baum_NIPH_528         | LIQTLIRFYK  | HIIQPEHIAF | LRLVIEQTQC | NATLSQYLYE | KCALDVQNTI |
| acin_baum_NIPH_60          | LIQTLIRFYK  | HIIQPEHIAF | LRLVIEQTQC | NATLSQYLYE | KCALDVQNTI |
| acin_baum_NIPH_601         | LIQTLIRFYK  | HIIQPEHIAF | LRLVIEQTQC | NATLSQYLYE | KCALDVQNTI |
| acin_baum_NIPH_615         | LIHTLIRFYK  | HIIQPEHIAF | LRLVIEQTQC | NATLSQYLYE | KCALDVQNTI |
| acin_baum_NIPH_67          | LIQTLIRFYK  | HIIQPEHIAF | LRLVIEQTQC | NATLSQYLYE | KCALDVQNTI |
| acin_baum_NIPH_70          | LIQTLIRFYK  | HIIQPEHIAF | LRLVIEQTQC | NATLSQYLYE | KCALDVQNTI |
| acin_baum_NIPH_80          | LIQTLIRFYK  | HIIQPEHIAF | LRLVIEQTQC | NATLSQYLYE | KCALDVQNTI |



|                            |            |         |
|----------------------------|------------|---------|
| tr T2C8L3 T2C8L3_ACIBA     | DYINYCVDIF | LKGHHKV |
| acin_baum_ANC_4097         | DYINYCVDIF | LKGHHKV |
| acin_baum_AYE              | DYINYCVDIF | LKGHHKV |
| acin_baum_BM4587           | DYINYCVDIF | LKGHHKV |
| acin_baum_BM4701           | DYINYCV--- | -----   |
| acin_baum_BM4702           | DYINYCVDIF | LKGHHKV |
| acin_baum_BM4703           | DYINYCVDIF | LKGHHKV |
| acin_baum_BM4704           | DYINYCVDIF | LKGHHKV |
| acin_baum_BM4705           | DYIHYCVEIF | LKGHHKV |
| acin_baum_BM4706           | DYINYCVDIF | LKGHHKV |
| acin_baum_BM4707           | DYINYCVDIF | LKGHHKV |
| acin_baum_BM4708           | DYINYCVDIF | LKGHHKV |
| acin_baum_BM4709           | DYINYCVDIF | LKGHHKV |
| acin_baum_BM4710           | DYINYCVDIF | LKGHHKV |
| acin_baum_BM4711           | DYINYCVDIF | LKGHHKV |
| acin_baum_BM4712           | DYINYCVDIF | LKGHHKV |
| acin_baum_BM4713           | DYINYCVDIF | LKGHHKV |
| acin_baum_BM4714           | DYINYCVDIF | LKGHHKV |
| acin_baum_CIP_70_34t       | DYINYCVDIF | LKGHHKV |
| acin_baum_MRSN_3405        | DYINYCVDIF | LKGHHKV |
| acin_baum_NIPH_146         | DYINYCVDIF | LKGHHKV |
| acin_baum_NIPH_1669        | DYINYCVDIF | LKGHHKV |
| acin_baum_NIPH_1734        | DYINYCVDIF | LKGHHKV |
| acin_baum_NIPH_190         | DYINYCVDIF | LKGHHKV |
| acin_baum_NIPH_201         | DYINYCVDIF | LKGHHKV |
| acin_baum_NIPH_1362        | -----      | -----   |
| acin_baum_NIPH_1362.1      | DYINYCVDIF | LKGHHKV |
| acin_baum_NIPH_1362_redo   | -----      | -----   |
| acin_baum_NIPH_1362_redo.1 | DYINYCVDIF | LKGHHKV |
| acin_baum_NIPH_2061        | DYINYCVDIF | LKGHHKV |
| acin_baum_NIPH_24          | DYINYCVDIF | LKGHHKV |
| acin_baum_NIPH_290         | DYINYCVDIF | LKGHHKV |
| acin_baum_NIPH_329         | DYINYCVDIF | LKGHHKV |
| acin_baum_NIPH_335         | DYINYCVDIF | LKGHHKV |
| acin_baum_NIPH_410         | DYINYCVDIF | LKGHHKV |
| acin_baum_NIPH_527         | DYINYCVDIF | LKGHHKV |
| acin_baum_NIPH_528         | DYINYCVDIF | LKGHHKV |
| acin_baum_NIPH_60          | DYINYCVDIF | LKGHHKV |
| acin_baum_NIPH_601         | DYINYCVDIF | LKGHHKV |
| acin_baum_NIPH_615         | DYINYCVDIF | LKGHHKV |
| acin_baum_NIPH_67          | DYINYCVDIF | LKGHHKV |
| acin_baum_NIPH_70          | DYINYCVDIF | LKGHHKV |
| acin_baum_NIPH_80          | DYINY---   | -----   |
