# Supplementary material
Source: PubMed Central journal article supplement (PMC5836370)
Supplement: supp_RA117.000107_4677_1_supp_3201_wsxwgs.pdf [file supp_RA117.000107_4677_1_supp_3201_wsxwgs.pdf]

1  
OXA23 MNKYFTCYVV ASLFLSGCTV QHNLINETPS QIVQGHNOVI HQYFDEKNTS GVLVIQTDKK  
acin\_baum\_ANC\_4097 MNKYFTCYVV ASLFLSGCTV QHNLINETPS QIVQGHNOVI HQYFDEKNTS GVLVIQTDKK  
acin\_baum\_BM4706 MNKYFTCYVV ASLFLSGCTV QHNLINETPS QIVQGHNOVI HQYFDEKNTS GVLVIQTDKK  
acin\_baum\_BM4707 MNKYFTCYVV ASLFLSGCTV QHNLINETPS QIVQGHNOVI HQYFDEKNTS GVLVIQTDKK  
acin\_baum\_BM4708 MNKYFTCYVV ASLFLSGCTV QHNLINETPS QIVQGHNOVI HQYFDEKNTS GVLVIQTDKK  
acin\_baum\_BM4709 MNKYFTCYVV ASLFLSGCTV QHNLINETPS QIVQGHNOVI HQYFDEKNTS GVLVIQTDKK  
acin\_baum\_BM4710 MNKYFTCYVV ASLFLSGCTV QHNLINETPS QIVQGHNOVI HQYFDEKNTS GVLVIQTDKK  
acin\_baum\_BM4711 MNKYFTCYVV ASLFLSGCTV QHNLINETPS QIVQGHNOVI HQYFDEKNTS GVLVIQTDKK  
acin\_baum\_BM4712 MNKYFTCYVV ASLFLSGCTV QHNLINETPS QIVQGHNOVI HQYFDEKNTS GVLVIQTDKK  
acin\_baum\_MRSN\_3405 MNKYFTCYVV ASLFLSGCTV QHNLINETPS QIVQGHNOVI HQYFDEKNTS GVLVIQTDKK

61  
OXA23 INLYGNALSR ANTEYVPAST FKMLNALIGL ENQKTDINEI FKWKGEKRSF TAWEKDMTLG  
acin\_baum\_ANC\_4097 INLYGNALSR ANTEYVPAST FKMLNALIGL ENQKTDINEI FKWKGEKRSF TAWEKDMTLG  
acin\_baum\_BM4706 INLYGNALSR ANTEYVPAST FKMLNALIGL ENQKTDINEI FKWKGEKRSF TAWEKDMTLG  
acin\_baum\_BM4707 INLYGNALSR ANTEYVPAST FKMLNALIGL ENQKTDINEI FKWKGEKRSF TAWEKDMTLG  
acin\_baum\_BM4708 INLYGNALSR ANTEYVPAST FKMLNALIGL ENQKTDINEI FKWKGEKRSF TAWEKDMTLG  
acin\_baum\_BM4709 INLYGNALSR ANTEYVPAST FKMLNALIGL ENQKTDINEI FKWKGEKRSF TAWEKDMTLG  
acin\_baum\_BM4710 INLYGNALSR ANTEYVPAST FKMLNALIGL ENQKTDINEI FKWKGEKRSF TAWEKDMTLG  
acin\_baum\_BM4711 INLYGNALSR ANTEYVPAST FKMLNALIGL ENQKTDINEI FKWKGEKRSF TAWEKDMTLG  
acin\_baum\_BM4712 INLYGNALSR ANTEYVPAST FKMLNALIGL ENQKTDINEI FKWKGEKRSF TAWEKDMTLG  
acin\_baum\_MRSN\_3405 INLYGNALSR ANTEYVPAST FKMLNALIGL ENQKTDINEI FKWKGEKRSF TAWEKDMTLG

121  
OXA23 EAMKLSAVPV YQELARRIGL DLMQKEVKRI GFGNAEIGQQ VDNFWLVGPL KVTPIQEVF  
acin\_baum\_ANC\_4097 EAMKLSAVPV YQELARRIGL DLMQKEVKRI GFGNAEIGQQ VDNFWLVGPL KVTPIQEVF  
acin\_baum\_BM4706 EAMKLSAVPV YQELARRIGL DLMQKEVKRI GFGNAEIGQQ VDNFWLVGPL KVTPIQEVF  
acin\_baum\_BM4707 EAMKLSAVPV YQELARRIGL DLMQKEVKRI GFGNAEIGQQ VDNFWLVGPL KVTPIQEVF  
acin\_baum\_BM4708 EAMKLSAVPV YQELARRIGL DLMQKEVKRI GFGNAEIGQQ VDNFWLVGPL KVTPIQEVF  
acin\_baum\_BM4709 EAMKLSAVPV YQELARRIGL DLMQKEVKRI GFGNAEIGQQ VDNFWLVGPL KVTPIQEVF  
acin\_baum\_BM4710 EAMKLSAVPV YQELARRIGL DLMQKEVKRI GFGNAEIGQQ VDNFWLVGPL KVTPIQEVF  
acin\_baum\_BM4711 EAMKLSAVPV YQELARRIGL DLMQKEVKRI GFGNAEIGQQ VDNFWLVGPL KVTPIQEVF  
acin\_baum\_BM4712 EAMKLSAVPV YQELARRIGL DLMQKEVKRI GFGNAEIGQQ VDNFWLVGPL KVTPIQEVF  
acin\_baum\_MRSN\_3405 EAMKLSAVPV YQELARRIGL DLMQKEVKRI GFGNAEIGQQ VDNFWLVGPL KVTPIQEVF

181  
OXA23 VSQLAHTQLP FSEKVQANVK NMLLLEESNG YKIFGKTGWA MDIKPQVGWL TGWVEQPDGK  
acin\_baum\_ANC\_4097 VSQLAHTQLP FSEKVQANVK NMLLLEESNG YKIFGKTGWA MDIKPQVGWL TGWVEQPDGK  
acin\_baum\_BM4706 VSQLAHTQLP FSEKVQANVK NMLLLEESNG YKIFGKTGWA MDIKPQVGWL TGWVEQPDGK  
acin\_baum\_BM4707 VSQLAHTQLP FSEKVQANVK NMLLLEESNG YKIFGKTGWA MDIKPQVGWL TGWVEQPDGK  
acin\_baum\_BM4708 VSQLAHTQLP FSEKVQANVK NMLLLEESNG YKIFGKTGWA MDIKPQVGWL TGWVEQPDGK  
acin\_baum\_BM4709 VSQLAHTQLP FSEKVQANVK NMLLLEESNG YKIFGKTGWA MDIKPQVGWL TGWVEQPDGK  
acin\_baum\_BM4710 VSQLAHTQLP FSEKVQANVK NMLLLEESNG YKIFGKTGWA MDIKPQVGWL TGWVEQPDGK  
acin\_baum\_BM4711 VSQLAHTQLP FSEKVQANVK NMLLLEESNG YKIFGKTGWA MDIKPQVGWL TGWVEQPDGK  
acin\_baum\_BM4712 VSQLAHTQLP FSEKVQANVK NMLLLEESNG YKIFGKTGWA MDIKPQVGWL TGWVEQPDGK  
acin\_baum\_MRSN\_3405 VSQLAHTQLP FSEKVQANVK NMLLLEESNG YKIFGKTGWA MDIKPQVGWL TGWVEQPDGK

241  
OXA23 IVAFALNMEM RSEMPASIRN ELLMKSLKQL NII  
acin\_baum\_ANC\_4097 IVAFALNMEM RSEMPASIRN ELLMKSLKQL NII  
acin\_baum\_BM4706 IVAFALNMEM RSEMPASIRN ELLMKSLKQL NII  
acin\_baum\_BM4707 IVAFALNMEM RSEMPASIRN ELLMKSLKQL NII  
acin\_baum\_BM4708 IVAFALNMEM RSEMPASIRN ELLMKSLKQL NII  
acin\_baum\_BM4709 IVAFALNMEM RSEMPASIRN ELLMKSLKQL NII  
acin\_baum\_BM4710 IVAFALNMEM RSEMPASIRN ELLMKSLKQL NII  
acin\_baum\_BM4711 IVAFALNMEM RSEMPASIRN ELLMKSLKQL NII  
acin\_baum\_BM4712 IVAFALNMEM RSEMPASIRN ELLMKSLKQL NII  
acin\_baum\_MRSN\_3405 IVAFALNMEM RSEMPASIRN ELLMKSLKQL NII
